# Supplementary material for: Discovery of Guanfacine as a Novel TAAR1 Agonist: A Combination Strategy through Molecular Modeling Studies and Biological Assays
Source: MDPI journal article supplement (doi:10.3390/ph16111632), 2023-11-20
Supplement: s1 [file s1]

## SUPPORTING INFORMATION

### Discovery of Guanfacine as a novel TAAR1 agonist: a combination strategy through molecular modeling studies and biological assays

Elena Cichero<sup>1</sup>, Valeria Francesconi<sup>1</sup>, Beatrice Casini<sup>1</sup>, Monica Casale<sup>2</sup>, Evgeny Kanov<sup>3</sup>, Andrey S. Gerasimov<sup>3</sup>, Ilya Sukhanov<sup>4</sup>, Artem Savchenko<sup>4</sup>, Stefano Espinoza<sup>5,6</sup>, Raul R. Gainetdinov<sup>3,7</sup>, Michele Tonelli<sup>1\*</sup>

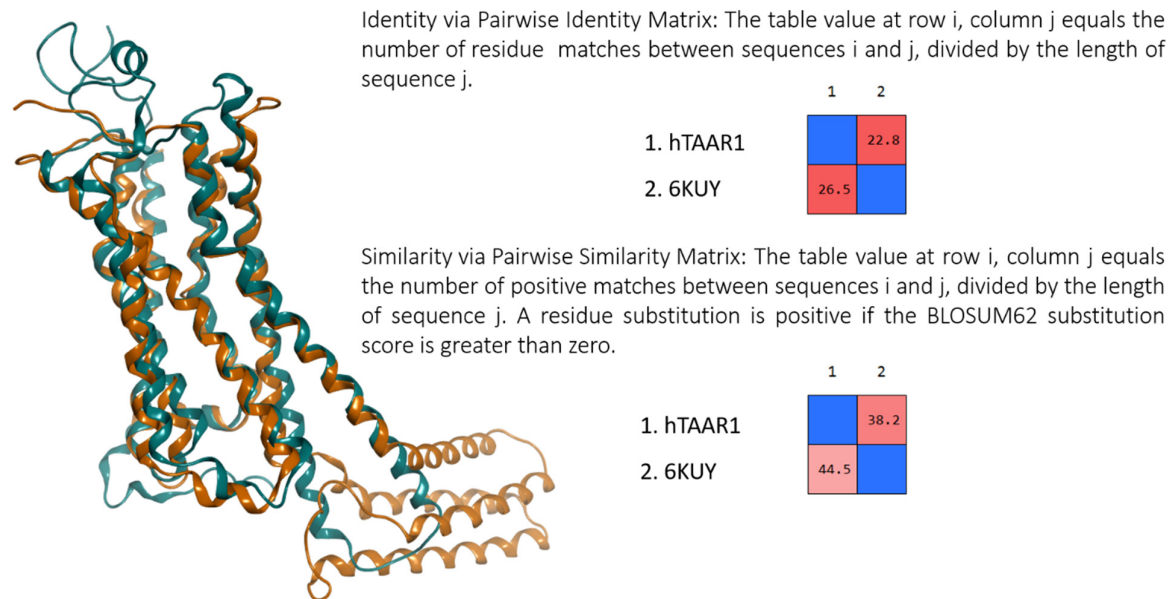

**Figure S1.** Pairwise Percentage Residue Identity (PPRI) and Similarity values as obtained by the *h*TAAR1 (shown as green ribbon) and  $\alpha_2$ -ADR (shown as gold ribbon) superposition.

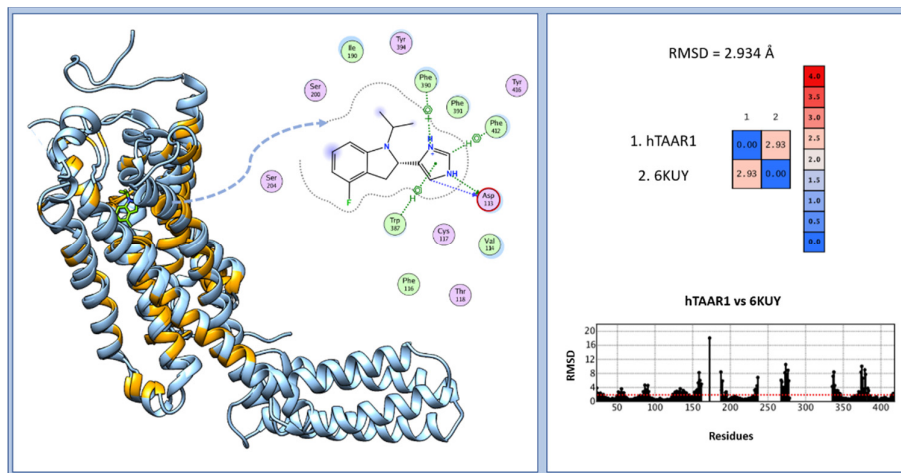

**Figure S2.** Superimposition of the hTAAR1 model and of the X-ray data about  $\alpha_2$ -ADR (left); the corresponding RMSD values are also reported (right).

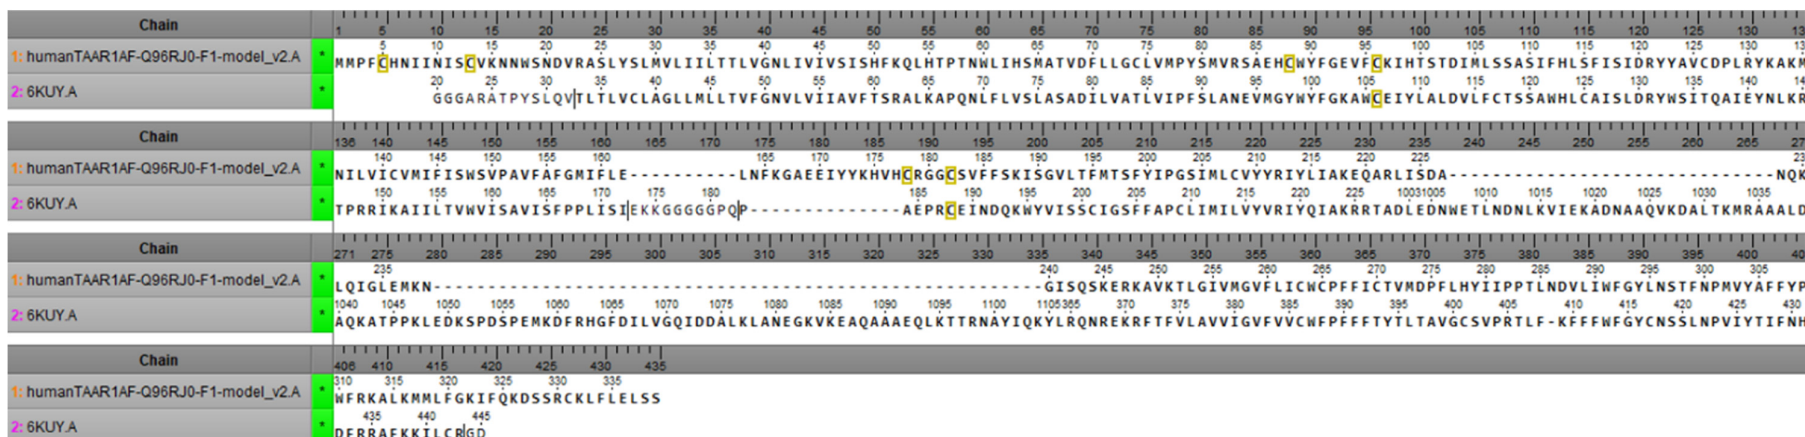

**Figure S3.** Alignment of the hTAAR1 and  $\alpha_2$ -ADR protein sequence.

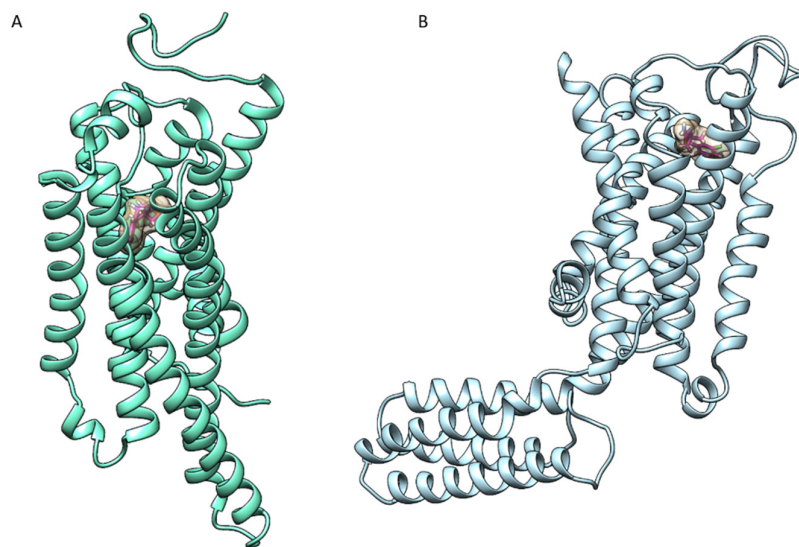

**Figure S4.** Full-view of the dual *h*TAAR1 (green) and  $\alpha_2$ -ADR (cyan) agonist **S18616** at the whole proteins. Ligand volume is highlighted in light brown.

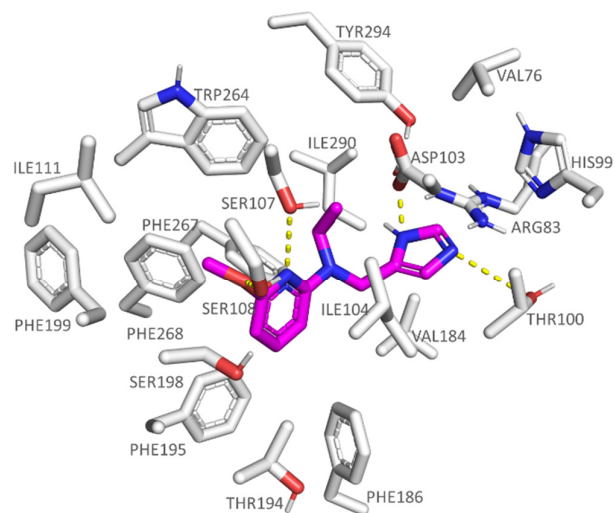

**Figure S5.** Docking positioning of **37** (C atom; magenta) at the *h*TAAR1 binding site. The most important residues involved in the agonist binding are labelled.

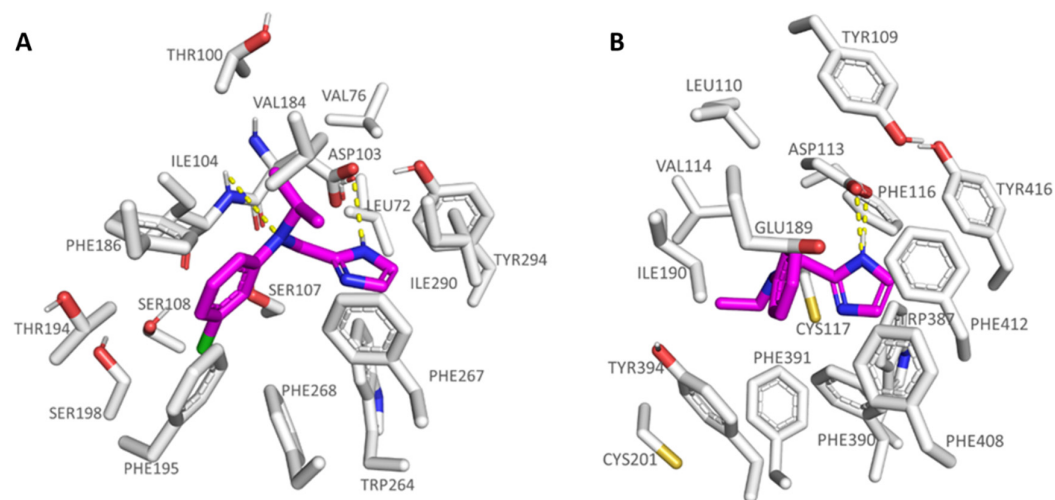

**Figure S6.** Docking positioning of **53** (C atom; magenta) at the *hTAAR1* binding site (A) and of **51** at the  $\alpha_2$ -ADR cavity (B). The most important residues involved in the agonist binding are labelled.

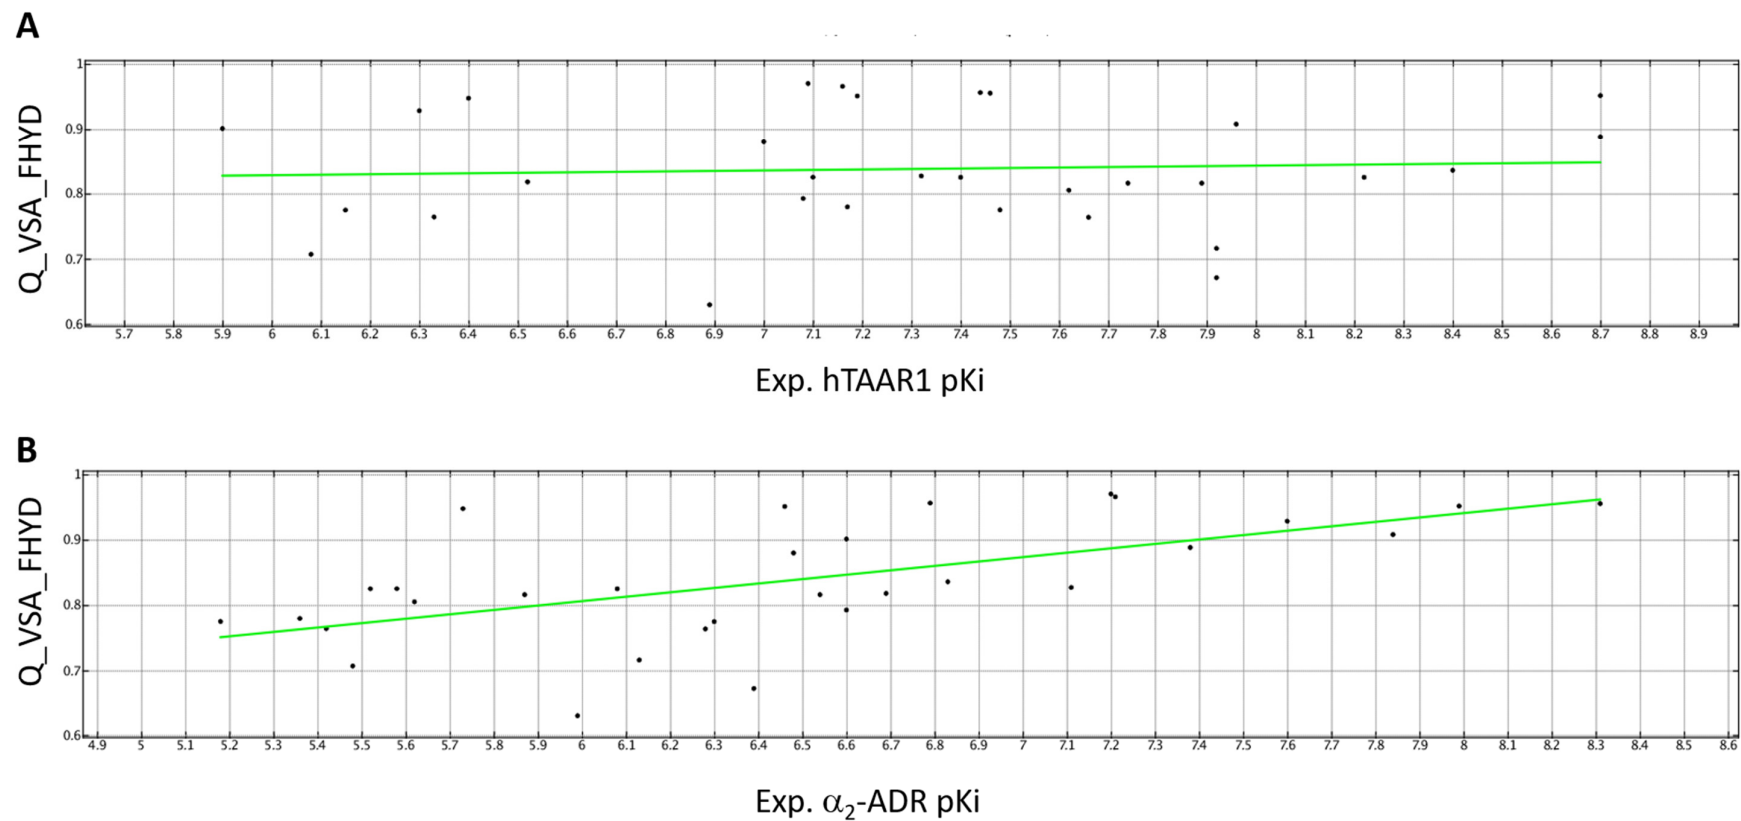

**Figure S7.** Schematic representation of the opposite role played by the Q\_VSA\_FHYD descriptor, shared by both models A and B, to influence the compound (*h*TAAR1 and  $\alpha_2$ -ADR) binding affinity values. Compounds are represented as dots.

**Table S1.** Five top scored docking positioning of **5a-5e**, **6a-6e**, **11-54** and the reference agonist **S18616** at the *h*TAAR1 (MOE software). The predicted  $\Delta G$  value of each protein-ligand complex has been reported, as calculated in terms of final scoring function (S, as Kcal/mol).

| Compound  | S       | E_conf   | E_place  | E_score1 | E_refine | E_score2 |
|-----------|---------|----------|----------|----------|----------|----------|
| <b>5a</b> | -5.1695 | -18.2208 | -15.3929 | -7.7987  | -11.6232 | -5.1695  |
| <b>5a</b> | -4.9402 | -21.9155 | -11.5622 | -8.0304  | -12.1832 | -4.9402  |
| <b>5a</b> | -4.7778 | -21.0637 | -16.6175 | -7.5495  | -18.4062 | -4.7778  |
| <b>5a</b> | -4.7573 | -18.8261 | -20.1722 | -9.0459  | -5.1190  | -4.7573  |
| <b>5a</b> | -4.5663 | -14.8291 | -15.6946 | -8.0510  | 4.8254   | -4.5663  |
| <b>5b</b> | -5.7383 | -14.1695 | -19.3227 | -7.0323  | -4.9471  | -5.7383  |
| <b>5b</b> | -5.6052 | -22.5438 | -11.9454 | -8.6970  | -8.4442  | -5.6052  |
| <b>5b</b> | -5.5773 | -23.7832 | -22.1466 | -8.3987  | -10.3642 | -5.5773  |
| <b>5b</b> | -5.5106 | -29.2996 | -20.4277 | -7.0394  | -2.9662  | -5.5106  |
| <b>5b</b> | -5.4926 | -12.3069 | -17.7338 | -7.0887  | -7.1517  | -5.4926  |
| <b>5c</b> | -5.6357 | -20.9581 | -18.7912 | -9.5620  | -10.2463 | -5.6357  |
| <b>5c</b> | -5.5748 | -25.0866 | -14.4636 | -9.5479  | -11.3133 | -5.5748  |
| <b>5c</b> | -5.4536 | -22.7922 | -15.5140 | -7.7365  | 3.8596   | -5.4536  |
| <b>5c</b> | -5.4508 | -26.8145 | -15.4513 | -9.1423  | -3.7877  | -5.4508  |
| <b>5c</b> | -5.4337 | -20.2956 | -15.6781 | -8.1212  | -7.7924  | -5.4337  |
| <b>5d</b> | -6.2309 | -4.6525  | -23.8586 | -5.9309  | -2.8928  | -6.2309  |
| <b>5d</b> | -6.2308 | 7.4696   | -22.6422 | -7.1454  | 13.1086  | -6.2308  |
| <b>5d</b> | -6.2161 | -2.9400  | -15.1797 | -6.7809  | 1.6499   | -6.2161  |
| <b>5d</b> | -6.1771 | -15.4006 | -14.3756 | -7.1999  | 8.1803   | -6.1771  |
| <b>5d</b> | -6.1644 | -15.2244 | -17.2960 | -6.3838  | 3.0907   | -6.1644  |
| <b>5e</b> | -7.2043 | 6.5957   | -16.4140 | -4.6198  | 31.5089  | -7.2043  |

|    |         |         |          |         |          |         |
|----|---------|---------|----------|---------|----------|---------|
| 5e | -5.9711 | 3.6161  | -17.3355 | -6.5913 | 16.9221  | -5.9711 |
| 5e | -5.7338 | -3.1095 | -20.2515 | -3.8649 | 25.5717  | -5.7338 |
| 5e | -5.6962 | 15.5878 | -27.9443 | -6.8042 | 21.7943  | -5.6962 |
| 5e | -5.6800 | 10.5990 | -12.9053 | -4.0603 | 24.0279  | -5.6800 |
| 5f | -9.0759 | 84.1545 | -20.2790 | -6.3740 | 18.1892  | -9.0759 |
| 5f | -8.6927 | 83.6578 | -15.7717 | -4.9193 | 5.3773   | -8.6927 |
| 5f | -8.6000 | 86.7519 | -13.4784 | -5.8091 | -0.5324  | -8.6000 |
| 5f | -8.2305 | 99.6059 | -25.1957 | -6.6039 | 21.3119  | -8.2305 |
| 5f | -8.0835 | 89.5961 | -19.5672 | -5.9362 | 11.4194  | -8.0835 |
| 6a | -5.3953 | 5.7389  | -18.6462 | -8.3960 | -15.9329 | -5.3953 |
| 6a | -4.7282 | 3.3257  | -16.5235 | -8.5974 | -10.0816 | -4.7282 |
| 6a | -4.4469 | 2.5288  | -13.6917 | -8.3754 | -16.2506 | -4.4469 |
| 6a | -4.4362 | 4.3633  | -17.8022 | -8.3708 | -14.5467 | -4.4362 |
| 6a | -4.4188 | 3.5514  | -22.1593 | -9.0078 | -16.2700 | -4.4188 |
| 6b | -5.4092 | 3.2340  | -22.2534 | -7.7432 | -5.3643  | -5.4092 |
| 6b | -5.3233 | -7.7289 | -12.5484 | -8.2110 | -3.0144  | -5.3233 |
| 6b | -5.3034 | 8.6078  | -14.4162 | -7.6342 | -7.1388  | -5.3034 |
| 6b | -5.2003 | -6.8580 | -14.9499 | -8.0918 | -2.7755  | -5.2003 |
| 6b | -5.1916 | -1.1206 | -12.7061 | -8.3744 | -12.3165 | -5.1916 |
| 6c | -5.9041 | 7.1270  | -20.9191 | -7.8765 | -3.3152  | -5.9041 |
| 6c | -5.5772 | 1.4818  | -16.4811 | -8.0756 | -9.7957  | -5.5772 |
| 6c | -5.2692 | 12.5013 | -23.5135 | -8.6044 | -3.2450  | -5.2692 |
| 6c | -5.2339 | -0.8363 | -12.1743 | -7.8086 | -3.2521  | -5.2339 |
| 6c | -4.9241 | 2.2011  | -24.1006 | -8.8501 | -10.9080 | -4.9241 |
| 6d | -6.4847 | 13.5517 | -18.7492 | -8.0687 | -2.7927  | -6.4847 |
| 6d | -6.3261 | 17.2291 | -12.2230 | -7.2478 | -6.8761  | -6.3261 |
| 6d | -6.1090 | 13.6725 | -18.2565 | -7.0425 | -4.6968  | -6.1090 |
| 6d | -5.8187 | 22.6733 | -27.8051 | -8.3171 | -3.0578  | -5.8187 |
| 6d | -5.7408 | 17.1991 | -21.4535 | -5.9925 | -5.8574  | -5.7408 |
| 6e | -6.7232 | 14.0008 | -12.2414 | -4.7474 | 16.6205  | -6.7232 |
| 6e | -6.4710 | 31.6233 | -19.7940 | -4.9765 | 9.7882   | -6.4710 |



|    |         |          |          |         |          |         |
|----|---------|----------|----------|---------|----------|---------|
| 6e | -6.1201 | 29.3200  | -23.5855 | -6.0087 | 22.8018  | -6.1201 |
| 6e | -5.8200 | 48.9085  | -11.2518 | -4.2977 | 19.7191  | -5.8200 |
| 6e | -5.6230 | 33.2730  | -13.4817 | -4.6373 | 19.9673  | -5.6230 |
| 6f | -8.5272 | 107.1073 | -16.2378 | -6.7236 | -1.5848  | -8.5272 |
| 6f | -8.3479 | 105.9284 | -20.2435 | -9.6098 | 8.5079   | -8.3479 |
| 6f | -8.2120 | 122.5868 | -15.4995 | -5.4549 | 13.4576  | -8.2120 |
| 6f | -8.2082 | 103.7487 | -19.5016 | -5.2509 | -4.7198  | -8.2082 |
| 6f | -8.0937 | 118.5481 | -16.2313 | -5.3252 | 8.4333   | -8.0937 |
| 11 | -5.7090 | 29.4435  | -19.6682 | -7.6979 | -14.7501 | -5.7090 |
| 11 | -5.4144 | 25.7424  | -20.7493 | -7.4555 | -11.6635 | -5.4144 |
| 11 | -5.3315 | 25.7919  | -23.5614 | -8.7031 | -12.0477 | -5.3315 |
| 11 | -5.3078 | 26.5097  | -15.8832 | -7.5579 | -11.8967 | -5.3078 |
| 11 | -5.2500 | 26.9098  | -20.7082 | -7.8863 | -11.5234 | -5.2500 |
| 12 | -6.1454 | 4.5846   | -19.2147 | -7.4327 | -18.0355 | -6.1454 |
| 12 | -5.8119 | 10.8324  | -19.2887 | -6.9958 | -6.3611  | -5.8119 |
| 12 | -5.7567 | 6.1498   | -20.1496 | -7.0165 | -8.8343  | -5.7567 |
| 12 | -5.7313 | 7.9706   | -22.8352 | -7.3023 | -9.3164  | -5.7313 |
| 12 | -5.6702 | 7.6444   | -23.9284 | -7.3762 | -9.2898  | -5.6702 |
| 13 | -5.4040 | -7.5283  | -21.3915 | -7.9391 | -11.8903 | -5.4040 |
| 13 | -5.2978 | -7.7251  | -21.1744 | -8.0338 | -17.0026 | -5.2978 |
| 13 | -5.2586 | -7.3780  | -15.3082 | -7.9345 | -15.5298 | -5.2586 |
| 13 | -4.9231 | -9.3209  | -15.5753 | -7.9255 | -15.6561 | -4.9231 |
| 13 | -4.8611 | -6.8786  | -21.1805 | -7.4549 | -7.8895  | -4.8611 |
| 14 | -6.4626 | 13.3278  | -22.1317 | -8.7533 | -18.7278 | -6.4626 |
| 14 | -6.0362 | 10.5786  | -24.7707 | -7.9620 | -10.7383 | -6.0362 |
| 14 | -5.9594 | 11.7547  | -16.0253 | -7.4753 | -8.2048  | -5.9594 |
| 14 | -5.8320 | 20.3669  | -15.2713 | -7.5084 | 2.1454   | -5.8320 |
| 14 | -5.7888 | 15.5874  | -17.4586 | -7.4924 | -4.7848  | -5.7888 |
| 15 | -6.7549 | 1.8752   | -23.3285 | -7.0698 | -15.0008 | -6.7549 |
| 15 | -6.6118 | -0.4646  | -15.6514 | -7.3002 | -11.8436 | -6.6118 |
| 15 | -6.5809 | 2.5772   | -17.2314 | -6.4612 | 10.1483  | -6.5809 |

|    |         |          |          |         |          |         |
|----|---------|----------|----------|---------|----------|---------|
| 15 | -6.2528 | 0.9143   | -19.1425 | -6.7599 | -12.9160 | -6.2528 |
| 15 | -6.2221 | -2.2671  | -23.5639 | -6.5445 | -6.2518  | -6.2221 |
| 16 | -7.1440 | -11.4955 | -17.7061 | -6.4942 | 8.9249   | -7.1440 |
| 16 | -6.9392 | -13.8669 | -18.3291 | -6.0322 | -10.0654 | -6.9392 |
| 16 | -6.8404 | -19.9071 | -16.9745 | -6.5779 | -5.2914  | -6.8404 |
| 16 | -6.6698 | -10.4167 | -20.2815 | -9.0931 | 0.9210   | -6.6698 |
| 16 | -6.3443 | -6.7179  | -18.7858 | -6.6863 | 9.1221   | -6.3443 |
| 17 | -7.3907 | 52.5896  | -16.6319 | -3.7547 | 14.0191  | -7.3907 |
| 17 | -7.0762 | 41.0422  | -13.9756 | -5.7136 | 9.3760   | -7.0762 |
| 17 | -7.0090 | 40.6282  | -23.6082 | -5.9601 | 37.3648  | -7.0090 |
| 17 | -6.8208 | 51.5054  | -20.9760 | -4.6030 | 30.9254  | -6.8208 |
| 17 | -6.5617 | 32.6579  | -17.5356 | -4.1918 | 18.9843  | -6.5617 |
| 18 | -6.9658 | 20.8021  | -15.6677 | -3.5344 | 5.2737   | -6.9658 |
| 18 | -6.6448 | 20.7317  | -16.3956 | -4.5367 | 6.5673   | -6.6448 |
| 18 | -6.6294 | 31.5781  | -11.2740 | -3.7528 | 4.3735   | -6.6294 |
| 18 | -6.0415 | 33.6351  | -14.6425 | -4.9314 | 4.1108   | -6.0415 |
| 18 | -5.7984 | 31.3644  | -18.9887 | -4.2499 | 17.7233  | -5.7984 |
| 19 | -6.9677 | 87.2845  | -21.5319 | -5.9824 | -8.0483  | -6.9677 |
| 19 | -6.6508 | 89.4113  | -19.1190 | -5.9106 | -6.5768  | -6.6508 |
| 19 | -6.1856 | 106.2361 | -22.8171 | -5.7849 | 12.1217  | -6.1856 |
| 19 | -6.0403 | 96.5439  | -18.3047 | -6.6155 | 6.9887   | -6.0403 |
| 19 | -5.9968 | 91.8334  | -22.6399 | -7.8948 | 4.3238   | -5.9968 |
| 20 | -7.5258 | 11.2913  | -21.8166 | -7.9865 | -11.8310 | -7.5258 |
| 20 | -7.1799 | 12.7587  | -18.6011 | -7.5269 | -19.9563 | -7.1799 |
| 20 | -7.0693 | 13.0458  | -22.4354 | -8.3809 | -17.6004 | -7.0693 |
| 20 | -6.6850 | 16.0688  | -23.6803 | -7.3477 | -1.4379  | -6.6850 |
| 20 | -6.6562 | 12.4321  | -25.1458 | -8.0126 | -7.6272  | -6.6562 |
| 21 | -6.8669 | 3.9646   | -26.6164 | -7.3751 | 5.1793   | -6.8669 |
| 21 | -6.7855 | 6.0261   | -18.1630 | -6.7628 | -0.8237  | -6.7855 |
| 21 | -6.6724 | 7.6049   | -15.6285 | -6.6255 | 7.4249   | -6.6724 |
| 21 | -6.3927 | 2.3062   | -23.9178 | -6.9732 | -1.9235  | -6.3927 |

|    |         |          |          |         |          |         |
|----|---------|----------|----------|---------|----------|---------|
| 21 | -6.2545 | 5.0963   | -19.7187 | -6.4777 | 24.6805  | -6.2545 |
| 22 | -6.9699 | 22.2918  | -15.3753 | -6.7936 | -4.2195  | -6.9699 |
| 22 | -6.9692 | 26.3006  | -14.1371 | -6.2116 | 2.2323   | -6.9692 |
| 22 | -6.8174 | 49.5994  | -17.2212 | -6.4308 | 14.2583  | -6.8174 |
| 22 | -6.6597 | 33.7985  | -18.8914 | -5.7997 | 21.4677  | -6.6597 |
| 22 | -6.6221 | 27.1289  | -21.4108 | -6.3729 | 7.9265   | -6.6221 |
| 23 | -7.5642 | -18.9900 | -13.9996 | -6.0764 | 13.4921  | -7.5642 |
| 23 | -7.4357 | -10.5288 | -14.4227 | -6.1477 | -13.7798 | -7.4357 |
| 23 | -7.4089 | -25.5283 | -18.0524 | -6.9771 | -6.1266  | -7.4089 |
| 23 | -7.2787 | -15.9898 | -13.9304 | -6.0964 | 25.2386  | -7.2787 |
| 23 | -7.0379 | -20.3794 | -16.0643 | -5.8960 | 23.9315  | -7.0379 |
| 24 | -7.3670 | -2.4750  | -17.3193 | -5.4394 | -12.8853 | -7.3670 |
| 24 | -6.9281 | -17.7132 | -20.3846 | -5.8126 | -9.8312  | -6.9281 |
| 24 | -6.3662 | -14.6660 | -17.3525 | -5.6328 | 10.5366  | -6.3662 |
| 24 | -6.2868 | -11.3076 | -19.7575 | -5.6213 | 8.0170   | -6.2868 |
| 24 | -6.2675 | -16.7269 | -20.3474 | -6.1909 | 10.4787  | -6.2675 |
| 25 | -7.8486 | 3.2458   | -18.8732 | -5.9071 | -7.5569  | -7.8486 |
| 25 | -7.5222 | -15.9165 | -22.7457 | -6.5862 | -0.3337  | -7.5222 |
| 25 | -6.8770 | -9.6813  | -19.5089 | -6.9067 | 4.5640   | -6.8770 |
| 25 | -6.8578 | 25.4552  | -17.4251 | -5.2570 | 15.4274  | -6.8578 |
| 25 | -6.6790 | -10.4764 | -19.1989 | -6.2277 | 18.0734  | -6.6790 |
| 26 | -6.9376 | -9.3366  | -18.5366 | -5.8124 | 25.0962  | -6.9376 |
| 26 | -6.8056 | 2.3957   | -23.0545 | -8.7950 | 3.2299   | -6.8056 |
| 26 | -6.7563 | -17.2014 | -13.8468 | -5.7417 | -1.2804  | -6.7563 |
| 26 | -6.7378 | -23.0396 | -19.8893 | -6.0405 | 23.0749  | -6.7378 |
| 26 | -6.7248 | -21.0151 | -13.3140 | -5.0265 | 1.5234   | -6.7248 |
| 27 | -7.4888 | 17.0501  | -21.2491 | -6.1899 | -4.8202  | -7.4888 |
| 27 | -7.3580 | 26.7535  | -17.1392 | -7.2857 | -10.1628 | -7.3580 |
| 27 | -7.2921 | 27.8285  | -12.7459 | -6.4586 | -8.3122  | -7.2921 |
| 27 | -6.8127 | 22.2414  | -26.3685 | -6.4341 | 3.8095   | -6.8127 |
| 27 | -6.5644 | 21.5504  | -25.4835 | -6.7994 | -0.2655  | -6.5644 |

|    |         |          |          |         |          |         |
|----|---------|----------|----------|---------|----------|---------|
| 28 | -7.2976 | -20.6007 | -19.7241 | -5.1740 | -2.9507  | -7.2976 |
| 28 | -7.0139 | -3.9735  | -18.6085 | -5.3661 | -2.2493  | -7.0139 |
| 28 | -6.9897 | -9.0595  | -19.6567 | -7.3524 | 0.0144   | -6.9897 |
| 28 | -6.7091 | -15.1525 | -21.1642 | -5.7263 | 9.5314   | -6.7091 |
| 28 | -6.3743 | -13.9352 | -15.0619 | -5.4695 | 6.7566   | -6.3743 |
| 29 | -7.1301 | -14.0748 | -16.4598 | -7.5679 | 9.7341   | -7.1301 |
| 29 | -6.7880 | -13.4198 | -21.1735 | -5.9730 | -12.3510 | -6.7880 |
| 29 | -6.4256 | -0.6906  | -18.3878 | -5.7179 | 7.6336   | -6.4256 |
| 29 | -6.3211 | -10.6713 | -20.4505 | -7.8579 | 10.9515  | -6.3211 |
| 29 | -6.3114 | -11.9885 | -21.1278 | -8.0907 | 8.9883   | -6.3114 |
| 30 | -6.9192 | -21.2923 | -12.7902 | -7.4089 | -12.7240 | -6.9192 |
| 30 | -6.8965 | -19.1422 | -10.0821 | -5.5674 | 2.8830   | -6.8965 |
| 30 | -6.8485 | -17.6830 | -8.7993  | -4.6989 | 9.1108   | -6.8485 |
| 30 | -6.6031 | -7.6384  | -16.1648 | -6.4406 | 4.0124   | -6.6031 |
| 30 | -6.5161 | 1.5010   | -22.4264 | -5.5059 | 21.0534  | -6.5161 |
| 31 | -7.2516 | -11.6325 | -21.9350 | -5.2964 | 13.7206  | -7.2516 |
| 31 | -7.1319 | -8.8200  | -12.8212 | -5.8105 | 22.5673  | -7.1319 |
| 31 | -7.0846 | 2.2205   | -10.7337 | -6.1193 | 9.3931   | -7.0846 |
| 31 | -7.0687 | -11.1753 | -15.0521 | -6.7364 | 20.6687  | -7.0687 |
| 31 | -7.0577 | -17.5523 | -22.4342 | -7.2072 | 15.6324  | -7.0577 |
| 32 | -7.9356 | 27.6877  | -17.6383 | -4.1913 | 1.7178   | -7.9356 |
| 32 | -7.3214 | 33.7168  | -14.6650 | -4.2081 | 21.1119  | -7.3214 |
| 32 | -7.0113 | 50.0754  | -18.5466 | -4.2158 | 52.7006  | -7.0113 |
| 32 | -6.7946 | 30.6555  | -22.1453 | -4.9065 | 16.8809  | -6.7946 |
| 32 | -6.5793 | 37.2774  | -23.1148 | -7.4483 | 11.9846  | -6.5793 |
| 33 | -6.9640 | 6.9785   | -18.3590 | -7.0461 | -19.1492 | -6.9640 |
| 33 | -6.7251 | 5.9511   | -16.8946 | -6.9217 | -7.6307  | -6.7251 |
| 33 | -6.6629 | 9.9691   | -18.4411 | -6.9176 | -13.6890 | -6.6629 |
| 33 | -6.6328 | 4.5592   | -22.2054 | -6.8794 | -12.6632 | -6.6328 |
| 33 | -6.1540 | 16.1598  | -14.7493 | -7.0201 | 1.6893   | -6.1540 |
| 34 | -7.3067 | 2.4457   | -18.9596 | -6.6431 | -18.2095 | -7.3067 |

|    |         |           |          |         |          |         |
|----|---------|-----------|----------|---------|----------|---------|
| 34 | -6.8822 | -6.0882   | -19.1647 | -6.7001 | -8.4519  | -6.8822 |
| 34 | -6.6972 | -7.5061   | -22.5950 | -7.4617 | -11.3809 | -6.6972 |
| 34 | -6.6733 | 19.9712   | -13.3194 | -6.8019 | 23.3943  | -6.6733 |
| 34 | -6.6547 | -1.7751   | -19.0071 | -6.8846 | 2.1441   | -6.6547 |
| 35 | -7.4790 | -25.5311  | -18.4569 | -4.7887 | 35.3934  | -7.4790 |
| 35 | -6.6609 | -29.8600  | -17.1907 | -6.1405 | 43.5066  | -6.6609 |
| 35 | -6.6300 | -22.9587  | -18.8594 | -6.8698 | 21.6276  | -6.6300 |
| 35 | -6.5796 | -40.8890  | -17.2634 | -5.7100 | 9.4792   | -6.5796 |
| 35 | -6.4968 | -43.0403  | -19.0494 | -5.3069 | 15.4455  | -6.4968 |
| 36 | -6.1875 | -49.3287  | -16.0939 | -6.3885 | 13.7182  | -6.1875 |
| 36 | -5.7137 | -39.2731  | -17.0539 | -6.4438 | -4.1801  | -5.7137 |
| 36 | -5.6017 | -47.7943  | -14.0281 | -6.0964 | -0.6161  | -5.6017 |
| 36 | -5.5020 | -45.5616  | -14.5369 | -7.0523 | 13.8918  | -5.5020 |
| 36 | -5.4890 | -52.1290  | -15.1353 | -7.0080 | 6.3151   | -5.4890 |
| 37 | -6.5851 | -61.0472  | -14.5192 | -5.5712 | 10.2112  | -6.5851 |
| 37 | -6.4277 | -25.4888  | -19.7830 | -6.5545 | 18.0433  | -6.4277 |
| 37 | -6.4246 | -57.8340  | -17.6521 | -6.8929 | 1.4875   | -6.4246 |
| 37 | -6.4235 | -56.8517  | -12.2515 | -7.5260 | -13.4837 | -6.4235 |
| 37 | -6.3679 | -59.2965  | -18.7761 | -7.4628 | 0.5092   | -6.3679 |
| 38 | -5.3083 | -142.0945 | -12.6841 | -7.1155 | -7.7869  | -5.3083 |
| 38 | -5.1815 | -135.7909 | -9.2237  | -5.5435 | -6.3058  | -5.1815 |
| 38 | -4.8488 | -132.6850 | -7.5954  | -5.9117 | 8.1609   | -4.8488 |
| 38 | -4.8380 | -127.0627 | -14.1474 | -6.0593 | 13.8880  | -4.8380 |
| 38 | -4.8256 | -129.0628 | -14.7706 | -7.5835 | 9.6282   | -4.8256 |
| 39 | -5.3215 | -105.9910 | -15.6297 | -7.6744 | 0.9608   | -5.3215 |
| 39 | -5.2457 | -102.3219 | -16.7335 | -7.4557 | -1.4090  | -5.2457 |
| 39 | -5.2107 | -111.7456 | -13.4833 | -7.3193 | -14.6700 | -5.2107 |
| 39 | -5.1875 | -110.3807 | -16.0767 | -6.6105 | 18.9068  | -5.1875 |
| 39 | -5.0764 | -105.3330 | -12.8936 | -7.9981 | -6.1866  | -5.0764 |
| 49 | -5.2669 | 16.8708   | -19.8830 | -8.0641 | -12.5071 | -5.2669 |
| 49 | -4.9535 | 20.4225   | -16.6438 | -7.6979 | -14.7143 | -4.9535 |

|        |         |          |          |         |          |         |
|--------|---------|----------|----------|---------|----------|---------|
| 49     | -4.9338 | 22.3600  | -17.8494 | -7.6705 | -9.7148  | -4.9338 |
| 49     | -4.9077 | 20.8152  | -16.6727 | -7.6482 | -13.4018 | -4.9077 |
| 49     | -4.7603 | 17.0036  | -19.1916 | -7.6223 | -12.9514 | -4.7603 |
| 50     | -6.3263 | 36.8180  | -23.8001 | -7.4244 | -1.8658  | -6.3263 |
| 50     | -6.2365 | 35.5761  | -22.1739 | -7.8108 | -8.9523  | -6.2365 |
| 50     | -5.7440 | 43.2290  | -11.9291 | -7.0000 | -9.5796  | -5.7440 |
| 50     | -5.3030 | 39.3780  | -18.8912 | -8.0380 | -9.0851  | -5.3030 |
| 50     | -5.1336 | 36.6016  | -19.1499 | -8.8704 | -8.0785  | -5.1336 |
| 51     | -6.4870 | 23.8828  | -15.6876 | -6.6502 | 2.0538   | -6.4870 |
| 51     | -6.2588 | 25.8877  | -22.5323 | -7.8278 | -8.0515  | -6.2588 |
| 51     | -6.1905 | 30.2390  | -11.5804 | -6.8121 | -5.4831  | -6.1905 |
| 51     | -5.9857 | 22.4576  | -17.9261 | -8.0817 | -6.3433  | -5.9857 |
| 51     | -5.9833 | 26.1091  | -23.4586 | -6.7510 | -8.4228  | -5.9833 |
| 52     | -6.9199 | 15.4097  | -18.5293 | -6.0291 | 22.3305  | -6.9199 |
| 52     | -6.5480 | 12.4628  | -20.7098 | -6.0875 | 17.7096  | -6.5480 |
| 52     | -6.3831 | 13.9484  | -20.4280 | -7.2490 | 4.9660   | -6.3831 |
| 52     | -6.2719 | 15.8614  | -11.5977 | -5.7030 | 9.3385   | -6.2719 |
| 52     | -6.2027 | 13.9959  | -14.5955 | -6.3727 | 1.0225   | -6.2027 |
| 53     | -6.8316 | 11.2652  | -16.5366 | -6.6175 | -0.5447  | -6.8316 |
| 53     | -6.7944 | 21.8153  | -17.7039 | -7.4494 | 7.8954   | -6.7944 |
| 53     | -6.6836 | 3.3764   | -16.9642 | -5.6855 | 22.9776  | -6.6836 |
| 53     | -6.6380 | 12.2019  | -17.2957 | -6.1427 | 3.8562   | -6.6380 |
| 53     | -6.6294 | 7.7140   | -18.3127 | -5.7353 | -2.3184  | -6.6294 |
| 54     | -7.4037 | 22.1949  | -13.4854 | -5.2514 | 0.6901   | -7.4037 |
| 54     | -6.9224 | 11.9278  | -13.6312 | -4.8080 | 11.5459  | -6.9224 |
| 54     | -6.4409 | 14.9964  | -12.5669 | -5.4748 | 2.2407   | -6.4409 |
| 54     | -6.2803 | 16.3959  | -11.2060 | -4.7610 | 18.5203  | -6.2803 |
| 54     | -6.2716 | 15.8469  | -20.8939 | -6.9144 | 3.7623   | -6.2716 |
| S18616 | -7.2540 | -78.9660 | -20.1860 | -6.6451 | -3.8317  | -7.2540 |
| S18616 | -6.5302 | -80.7608 | -24.7631 | -8.4053 | 1.2911   | -6.5302 |
| S18616 | -6.2843 | -75.6964 | -23.0394 | -9.7113 | 0.1749   | -6.2843 |

|               |         |          |          |         |        |         |
|---------------|---------|----------|----------|---------|--------|---------|
| <b>S18616</b> | -6.0826 | -67.0448 | -21.8553 | -8.3635 | 4.8944 | -6.0826 |
| <b>S18616</b> | -6.0375 | -69.6867 | -15.9147 | -6.5721 | 6.7722 | -6.0375 |

**Table S2.** Five top scored docking positioning of **5a-5e**, **6a-6e**, **11-54** and the reference agonist **S18616** at the  $\alpha_2$ -ADR (MOE software). The predicted  $\Delta G$  value of each protein-ligand complex has been reported, as calculated in terms of final scoring function (S, as Kcal/mol).

| Compound  | S       | E_conf   | E_place  | E_score1 | E_refine | E_score2 |
|-----------|---------|----------|----------|----------|----------|----------|
| <b>5a</b> | -4.8586 | -24.6135 | -16.3394 | -8.4980  | -28.3288 | -4.8586  |
| <b>5a</b> | -4.6276 | -24.5541 | -24.3329 | -8.5346  | -27.1076 | -4.6276  |
| <b>5a</b> | -4.5228 | -24.7498 | -14.0069 | -8.4813  | -24.3698 | -4.5228  |
| <b>5a</b> | -4.4926 | -24.3935 | -13.6725 | -9.1069  | -20.2049 | -4.4926  |
| <b>5a</b> | -4.3883 | -23.1719 | -16.4793 | -8.4661  | -22.3050 | -4.3883  |
| <b>5b</b> | -5.6235 | -35.0779 | -18.1036 | -9.0295  | -25.9453 | -5.6235  |
| <b>5b</b> | -5.6087 | -35.0746 | -15.8406 | -9.8561  | -25.9431 | -5.6087  |
| <b>5b</b> | -5.5957 | -35.0741 | -18.3770 | -9.4665  | -25.9385 | -5.5957  |
| <b>5b</b> | -5.5213 | -34.9964 | -20.7360 | -9.5987  | -29.9274 | -5.5213  |
| <b>5b</b> | -5.4698 | -35.9122 | -18.0356 | -9.2531  | -27.8051 | -5.4698  |
| <b>5c</b> | -5.6971 | -33.9166 | -21.4063 | -9.4918  | -29.9051 | -5.6971  |
| <b>5c</b> | -5.6018 | -34.5350 | -17.9618 | -10.2308 | -30.0033 | -5.6018  |
| <b>5c</b> | -5.5790 | -34.3260 | -17.8880 | -9.7142  | -29.9054 | -5.5790  |
| <b>5c</b> | -5.1553 | -33.7042 | -12.4049 | -9.3017  | -25.1663 | -5.1553  |
| <b>5c</b> | -5.1022 | -34.8817 | -19.8985 | -9.8771  | -26.3130 | -5.1022  |
| <b>5d</b> | -6.6975 | -24.0750 | -18.8442 | -9.6650  | -31.0271 | -6.6975  |
| <b>5d</b> | -6.6468 | -27.0047 | -27.9347 | -9.4997  | -29.5467 | -6.6468  |
| <b>5d</b> | -6.6046 | -25.0672 | -24.6577 | -9.9896  | -30.9893 | -6.6046  |
| <b>5d</b> | -6.4712 | -26.6302 | -27.2452 | -9.9546  | -31.1768 | -6.4712  |
| <b>5d</b> | -6.4128 | -27.8938 | -24.6200 | -9.7864  | -32.4074 | -6.4128  |
| <b>5e</b> | -7.7755 | -27.0518 | -30.8449 | -9.5500  | -30.2690 | -7.7755  |

|    |         |          |          |          |          |         |
|----|---------|----------|----------|----------|----------|---------|
| 5e | -7.4451 | -26.8237 | -22.4104 | -10.2015 | -29.4374 | -7.4451 |
| 5e | -7.2488 | -22.0454 | -27.3508 | -10.1843 | -26.4730 | -7.2488 |
| 5e | -7.2126 | -18.3991 | -24.7323 | -10.6521 | -32.4382 | -7.2126 |
| 5e | -6.9625 | -28.2883 | -22.8544 | -9.0794  | -28.2641 | -6.9625 |
| 5f | -8.5205 | 67.0418  | -22.9174 | -9.0811  | -19.9307 | -8.5205 |
| 5f | -7.9588 | 66.6432  | -25.5324 | -8.7483  | -22.6765 | -7.9588 |
| 5f | -7.8949 | 67.4212  | -26.1867 | -8.6180  | -23.2117 | -7.8949 |
| 5f | -7.7658 | 69.0728  | -21.7586 | -9.1882  | -21.8958 | -7.7658 |
| 5f | -7.4667 | 70.6896  | -26.0858 | -8.6072  | -24.0882 | -7.4667 |
| 6a | -4.5923 | 1.3917   | -16.0038 | -8.7212  | -22.6771 | -4.5923 |
| 6a | -4.5848 | 1.8910   | -13.5773 | -9.6259  | -18.8813 | -4.5848 |
| 6a | -4.5240 | 0.6075   | -18.4029 | -9.0138  | -27.3238 | -4.5240 |
| 6a | -4.4712 | 0.7750   | -13.1543 | -9.1723  | -22.9108 | -4.4712 |
| 6a | -4.4480 | 1.5839   | -19.6700 | -9.0532  | -28.8079 | -4.4480 |
| 6b | -5.5751 | -11.9718 | -21.8407 | -10.3889 | -30.8106 | -5.5751 |
| 6b | -5.3476 | -11.0347 | -15.4176 | -9.2901  | -28.0222 | -5.3476 |
| 6b | -5.2181 | -11.7669 | -15.3975 | -9.5230  | -24.3644 | -5.2181 |
| 6b | -5.0697 | -11.6377 | -14.2715 | -9.2423  | -21.3898 | -5.0697 |
| 6b | -4.9603 | -6.4500  | -14.4135 | -9.4583  | -29.6776 | -4.9603 |
| 6c | -5.6721 | -8.3077  | -21.9437 | -9.5122  | -31.3923 | -5.6721 |
| 6c | -5.5861 | -9.8174  | -23.5658 | -9.5916  | -29.6594 | -5.5861 |
| 6c | -5.4044 | -9.0422  | -13.5352 | -9.1567  | -24.4290 | -5.4044 |
| 6c | -5.3778 | -9.0981  | -15.2839 | -9.9294  | -24.1277 | -5.3778 |
| 6c | -5.3306 | -7.9226  | -13.1808 | -9.0863  | -25.2748 | -5.3306 |
| 6d | -6.6008 | -0.3248  | -24.8208 | -10.3116 | -31.2008 | -6.6008 |
| 6d | -6.4652 | -0.9956  | -20.6028 | -9.6940  | -29.2753 | -6.4652 |
| 6d | -6.4627 | 0.9562   | -28.1860 | -10.4432 | -31.7838 | -6.4627 |
| 6d | -6.2677 | -0.0595  | -12.6899 | -9.5491  | -30.1310 | -6.2677 |
| 6d | -6.2552 | 1.6043   | -20.9041 | -9.4861  | -22.5559 | -6.2552 |
| 6e | -7.4403 | -3.4952  | -19.8243 | -8.9487  | -27.0887 | -7.4403 |
| 6e | -7.3642 | -1.9331  | -22.8069 | -9.5952  | -30.5953 | -7.3642 |



|    |         |          |          |         |          |         |
|----|---------|----------|----------|---------|----------|---------|
| 6e | -7.1489 | 7.4743   | -27.1922 | -9.4821 | -30.1815 | -7.1489 |
| 6e | -7.1156 | 7.6250   | -27.2737 | -9.3741 | -29.4376 | -7.1156 |
| 6e | -7.0922 | -4.5141  | -26.7742 | -9.1401 | -30.4486 | -7.0922 |
| 6f | -8.4565 | 95.5462  | -21.9721 | -8.8043 | -19.7170 | -8.4565 |
| 6f | -8.3076 | 95.6416  | -23.0525 | -9.5390 | -20.1698 | -8.3076 |
| 6f | -8.2740 | 99.0312  | -22.9908 | -9.4941 | -21.2341 | -8.2740 |
| 6f | -8.1691 | 97.1621  | -26.3011 | -9.4989 | -23.8912 | -8.1691 |
| 6f | -7.8912 | 96.0249  | -22.8691 | -8.8897 | -21.7882 | -7.8912 |
| 11 | -5.2893 | 24.4764  | -17.6885 | -7.5478 | -18.0551 | -5.2893 |
| 11 | -4.9647 | 24.4556  | -16.1683 | -7.4850 | -18.2605 | -4.9647 |
| 11 | -4.8230 | 23.8081  | -17.1736 | -8.0563 | -18.7143 | -4.8230 |
| 11 | -4.7963 | 23.9432  | -21.2175 | -8.3497 | -19.3325 | -4.7963 |
| 11 | -4.7555 | 23.6229  | -20.5758 | -7.4879 | -18.5984 | -4.7555 |
| 12 | -5.6061 | 4.1941   | -28.3745 | -7.6899 | -20.9171 | -5.6061 |
| 12 | -5.4827 | 4.9921   | -19.7117 | -7.7559 | -16.4729 | -5.4827 |
| 12 | -5.4537 | 5.5342   | -17.0294 | -7.6759 | -17.4785 | -5.4537 |
| 12 | -5.3983 | 3.7078   | -18.7093 | -7.7303 | -18.0687 | -5.3983 |
| 12 | -5.0632 | 4.7602   | -20.5591 | -8.2469 | -19.3343 | -5.0632 |
| 13 | -5.0472 | -10.6894 | -17.0682 | -7.9067 | -19.5178 | -5.0472 |
| 13 | -4.6605 | -8.5908  | -19.0651 | -7.8658 | -22.1610 | -4.6605 |
| 13 | -4.5311 | -9.6731  | -21.6857 | -8.0013 | -18.9952 | -4.5311 |
| 13 | -4.3904 | -10.2218 | -19.0629 | -9.1749 | -21.2946 | -4.3904 |
| 13 | -4.3366 | -12.0369 | -14.5865 | -8.5393 | -20.6742 | -4.3366 |
| 14 | -5.9150 | 9.0452   | -23.4623 | -8.6325 | -20.7938 | -5.9150 |
| 14 | -5.7216 | 8.3770   | -25.7961 | -8.0179 | -22.1183 | -5.7216 |
| 14 | -5.6361 | 8.7530   | -19.5716 | -8.0999 | -19.6382 | -5.6361 |
| 14 | -5.5880 | 9.4693   | -17.8920 | -8.6200 | -19.8565 | -5.5880 |
| 14 | -5.5272 | 7.5691   | -18.4660 | -8.1814 | -23.6766 | -5.5272 |
| 15 | -6.4849 | -5.8884  | -18.7245 | -8.6114 | -22.4379 | -6.4849 |
| 15 | -6.1890 | -3.7572  | -22.5364 | -8.1282 | -20.4216 | -6.1890 |
| 15 | -6.0194 | -5.8803  | -21.2829 | -8.2021 | -21.6515 | -6.0194 |

|    |         |          |          |         |          |         |
|----|---------|----------|----------|---------|----------|---------|
| 15 | -6.0008 | -5.2049  | -24.9710 | -8.0945 | -24.7719 | -6.0008 |
| 15 | -5.9919 | -5.1193  | -24.8000 | -8.0240 | -22.8502 | -5.9919 |
| 16 | -6.4794 | -24.6931 | -23.1690 | -8.6052 | -19.6042 | -6.4794 |
| 16 | -6.3793 | -22.3213 | -21.0684 | -8.3938 | -22.5907 | -6.3793 |
| 16 | -6.3629 | -22.8980 | -17.0807 | -9.0425 | -24.2801 | -6.3629 |
| 16 | -6.2030 | -27.9002 | -19.7858 | -9.0118 | -26.2401 | -6.2030 |
| 16 | -6.1590 | -26.6745 | -20.6292 | -8.6154 | -18.8615 | -6.1590 |
| 17 | -8.2375 | 15.5268  | -20.8035 | -8.6664 | -25.6318 | -8.2375 |
| 17 | -8.0483 | 15.6743  | -21.9344 | -8.1806 | -27.1242 | -8.0483 |
| 17 | -7.9764 | 13.1765  | -24.4243 | -9.4227 | -25.8361 | -7.9764 |
| 17 | -7.9255 | 12.7603  | -26.3356 | -8.6168 | -28.9424 | -7.9255 |
| 17 | -7.8681 | 18.8517  | -21.1059 | -8.6939 | -17.9974 | -7.8681 |
| 18 | -8.1808 | 11.4209  | -16.4293 | -9.2084 | -23.9614 | -8.1808 |
| 18 | -8.0580 | 13.0149  | -26.8273 | -8.3839 | -23.4903 | -8.0580 |
| 18 | -7.8717 | 11.2027  | -22.1308 | -8.4057 | -24.3585 | -7.8717 |
| 18 | -7.6858 | 10.0537  | -19.3899 | -9.0605 | -26.8126 | -7.6858 |
| 18 | -7.5633 | 11.2682  | -19.7094 | -9.1780 | -23.6707 | -7.5633 |
| 19 | -6.4273 | 86.0574  | -22.2260 | -8.7334 | -24.3412 | -6.4273 |
| 19 | -6.4140 | 81.3789  | -22.6699 | -8.8874 | -24.7326 | -6.4140 |
| 19 | -6.3230 | 82.9245  | -20.4913 | -8.7655 | -21.3012 | -6.3230 |
| 19 | -6.1992 | 84.2436  | -22.3513 | -8.4652 | -24.2098 | -6.1992 |
| 19 | -6.1686 | 82.8313  | -23.7100 | -8.9442 | -24.4580 | -6.1686 |
| 20 | -6.3690 | 7.6975   | -22.5205 | -8.5778 | -26.4197 | -6.3690 |
| 20 | -6.3401 | 8.6907   | -27.4004 | -8.2581 | -23.8456 | -6.3401 |
| 20 | -5.8429 | 8.8081   | -23.5738 | -8.2467 | -24.8103 | -5.8429 |
| 20 | -5.6251 | 8.6018   | -22.7828 | -8.8563 | -24.1714 | -5.6251 |
| 20 | -5.6100 | 8.5109   | -25.3998 | -8.2508 | -16.6768 | -5.6100 |
| 21 | -6.8500 | -2.7011  | -23.7407 | -9.8279 | -23.5773 | -6.8500 |
| 21 | -6.7064 | -3.6583  | -22.0166 | -9.3438 | -23.1503 | -6.7064 |
| 21 | -6.5792 | -3.0447  | -25.2036 | -8.4807 | -24.6228 | -6.5792 |
| 21 | -6.4927 | -0.6995  | -19.1569 | -9.0490 | -22.0617 | -6.4927 |

|           |         |          |          |         |          |         |
|-----------|---------|----------|----------|---------|----------|---------|
| <b>21</b> | -6.4824 | -3.7909  | -26.1106 | -9.2498 | -26.1341 | -6.4824 |
| <b>22</b> | -6.7659 | 6.6827   | -25.1337 | -8.7522 | -25.7750 | -6.7659 |
| <b>22</b> | -6.6615 | 2.3951   | -25.2083 | -9.1748 | -28.3974 | -6.6615 |
| <b>22</b> | -6.5301 | 8.6240   | -31.5079 | -8.6680 | -24.8482 | -6.5301 |
| <b>22</b> | -6.5279 | 10.8462  | -25.0707 | -8.8380 | -25.2320 | -6.5279 |
| <b>22</b> | -6.5259 | 9.5229   | -26.0648 | -8.9508 | -25.9095 | -6.5259 |
| <b>23</b> | -7.0465 | -29.0430 | -19.5709 | -8.4389 | -21.4439 | -7.0465 |
| <b>23</b> | -6.7754 | -29.8078 | -30.5248 | -8.4764 | -28.5234 | -6.7754 |
| <b>23</b> | -6.7675 | -31.4773 | -20.4636 | -9.1517 | -20.3325 | -6.7675 |
| <b>23</b> | -6.7038 | -28.9750 | -25.6602 | -9.6049 | -20.5462 | -6.7038 |
| <b>23</b> | -6.6621 | -34.2820 | -18.4518 | -8.5893 | -28.0422 | -6.6621 |
| <b>24</b> | -6.9405 | -21.8172 | -20.0137 | -8.6395 | -26.5432 | -6.9405 |
| <b>24</b> | -6.9078 | -28.6335 | -23.6255 | -8.7572 | -20.9000 | -6.9078 |
| <b>24</b> | -6.8661 | -30.0145 | -21.5256 | -8.5202 | -21.4679 | -6.8661 |
| <b>24</b> | -6.6388 | -27.7759 | -26.5501 | -9.5617 | -27.7064 | -6.6388 |
| <b>24</b> | -6.6353 | -26.7619 | -23.1236 | -9.1385 | -23.8164 | -6.6353 |
| <b>25</b> | -7.7120 | -16.5462 | -22.6576 | -8.7023 | -9.1316  | -7.7120 |
| <b>25</b> | -7.6023 | -23.3050 | -24.0619 | -8.9729 | -25.6927 | -7.6023 |
| <b>25</b> | -7.1223 | -24.3009 | -26.0583 | -8.7093 | -22.7181 | -7.1223 |
| <b>25</b> | -7.1162 | -26.0173 | -19.4638 | -8.6300 | -26.4235 | -7.1162 |
| <b>25</b> | -7.1073 | -23.4272 | -17.1189 | -8.8531 | -19.6431 | -7.1073 |
| <b>26</b> | -7.3091 | -48.4599 | -20.2525 | -8.9794 | -25.3975 | -7.3091 |
| <b>26</b> | -7.2557 | -43.8436 | -25.0952 | -9.3903 | -20.9577 | -7.2557 |
| <b>26</b> | -7.1310 | -47.5892 | -26.3670 | -9.5929 | -22.0982 | -7.1310 |
| <b>26</b> | -7.0794 | -47.9655 | -20.9768 | -8.7592 | -21.0231 | -7.0794 |
| <b>26</b> | -7.0100 | -41.7263 | -23.2032 | -9.2199 | -22.1466 | -7.0100 |
| <b>27</b> | -6.9431 | 9.6766   | -27.7418 | -8.4787 | -24.9387 | -6.9431 |
| <b>27</b> | -6.6521 | 14.4414  | -25.5952 | -8.4380 | -16.4351 | -6.6521 |
| <b>27</b> | -6.6221 | 9.3678   | -19.5618 | -8.3047 | -21.5235 | -6.6221 |
| <b>27</b> | -6.5012 | 8.9346   | -19.9677 | -8.4928 | -27.3237 | -6.5012 |
| <b>27</b> | -6.4085 | 8.4955   | -27.0645 | -9.0949 | -23.0589 | -6.4085 |

|    |         |          |          |          |          |         |
|----|---------|----------|----------|----------|----------|---------|
| 28 | -7.1420 | -28.3034 | -21.3577 | -8.8130  | -22.8444 | -7.1420 |
| 28 | -7.0870 | -28.1973 | -25.7588 | -8.7902  | -25.0603 | -7.0870 |
| 28 | -6.9778 | -31.1672 | -20.3190 | -8.9944  | -20.5990 | -6.9778 |
| 28 | -6.9118 | -25.6494 | -19.1445 | -8.7814  | -21.3153 | -6.9118 |
| 28 | -6.8751 | -29.0449 | -25.1623 | -8.8561  | -21.7327 | -6.8751 |
| 29 | -7.2080 | -25.2156 | -20.0452 | -9.0478  | -19.9407 | -7.2080 |
| 29 | -7.1689 | -23.6104 | -26.1553 | -9.3239  | -23.1209 | -7.1689 |
| 29 | -7.0833 | -25.2451 | -17.7026 | -9.4114  | -26.3755 | -7.0833 |
| 29 | -6.9566 | -22.4460 | -20.4634 | -9.1144  | -23.7898 | -6.9566 |
| 29 | -6.9469 | -19.8292 | -25.8112 | -8.9191  | -24.9063 | -6.9469 |
| 30 | -7.3630 | -33.1237 | -23.5025 | -9.2702  | -18.5080 | -7.3630 |
| 30 | -7.0617 | -29.6795 | -27.7426 | -9.9727  | -27.2527 | -7.0617 |
| 30 | -6.5697 | -31.1752 | -21.2295 | -8.8782  | -19.1557 | -6.5697 |
| 30 | -6.4474 | -33.9640 | -26.6247 | -10.7990 | -30.0843 | -6.4474 |
| 30 | -6.3631 | -25.4738 | -24.4466 | -9.0089  | -9.9808  | -6.3631 |
| 31 | -7.0555 | -32.6103 | -26.3370 | -8.4073  | -27.0119 | -7.0555 |
| 31 | -6.6533 | -29.2583 | -20.1706 | -8.4779  | -24.6192 | -6.6533 |
| 31 | -6.6374 | -30.1124 | -31.8876 | -9.4331  | -26.1290 | -6.6374 |
| 31 | -6.6122 | -34.4360 | -23.2535 | -8.5433  | -28.9754 | -6.6122 |
| 31 | -6.4535 | -31.0395 | -23.5407 | -8.4279  | -26.0056 | -6.4535 |
| 32 | -7.9596 | 10.6751  | -27.8576 | -8.5502  | -32.4183 | -7.9596 |
| 32 | -7.4148 | 14.4770  | -21.7666 | -8.8117  | -27.2807 | -7.4148 |
| 32 | -7.2023 | 11.0701  | -20.3251 | -9.0098  | -30.1122 | -7.2023 |
| 32 | -7.1874 | 11.3289  | -22.5557 | -9.3997  | -34.9901 | -7.1874 |
| 32 | -7.1791 | 11.3595  | -15.0901 | -8.7211  | -35.0485 | -7.1791 |
| 33 | -6.3158 | 1.1002   | -21.4893 | -8.4109  | -22.1087 | -6.3158 |
| 33 | -6.2099 | 2.8879   | -21.1667 | -8.4180  | -22.5104 | -6.2099 |
| 33 | -5.9487 | 4.1585   | -20.6245 | -8.5666  | -24.8364 | -5.9487 |
| 33 | -5.8188 | 2.4838   | -24.3193 | -8.5676  | -22.5270 | -5.8188 |
| 33 | -5.7877 | 2.9869   | -18.0356 | -8.5083  | -20.5043 | -5.7877 |
| 34 | -6.8627 | -11.9049 | -20.8585 | -8.5721  | -25.5698 | -6.8627 |

|    |         |           |          |         |          |         |
|----|---------|-----------|----------|---------|----------|---------|
| 34 | -6.3844 | -8.5546   | -18.5868 | -8.6418 | -23.9540 | -6.3844 |
| 34 | -6.3648 | -10.3306  | -17.4247 | -8.8636 | -24.3822 | -6.3648 |
| 34 | -6.2867 | -11.0908  | -28.6052 | -8.6405 | -20.5439 | -6.2867 |
| 34 | -6.2282 | -8.2014   | -23.6725 | -8.9825 | -21.5663 | -6.2282 |
| 35 | -7.2505 | -61.8967  | -22.8761 | -8.4210 | -27.3701 | -7.2505 |
| 35 | -7.0719 | -63.5825  | -24.5839 | -8.8749 | -23.2964 | -7.0719 |
| 35 | -7.0673 | -60.0247  | -27.3402 | -8.7845 | -25.1516 | -7.0673 |
| 35 | -7.0603 | -62.0371  | -21.2994 | -8.8864 | -24.9197 | -7.0603 |
| 35 | -6.9746 | -60.7380  | -27.7190 | -9.7019 | -25.8681 | -6.9746 |
| 36 | -5.5456 | -58.1209  | -22.9800 | -8.6841 | -24.0728 | -5.5456 |
| 36 | -5.3522 | -57.0890  | -28.8481 | -8.4498 | -21.7855 | -5.3522 |
| 36 | -5.3061 | -58.7202  | -17.9359 | -8.3096 | -24.3760 | -5.3061 |
| 36 | -5.2991 | -56.3874  | -18.8060 | -8.4978 | -21.5264 | -5.2991 |
| 36 | -5.2873 | -59.4140  | -21.6832 | -8.4145 | -25.4309 | -5.2873 |
| 37 | -6.0881 | -67.7509  | -24.4429 | -9.2699 | -22.0982 | -6.0881 |
| 37 | -5.9731 | -73.9127  | -19.0932 | -8.6246 | -29.7191 | -5.9731 |
| 37 | -5.9525 | -71.2678  | -21.8601 | -8.6319 | -29.0978 | -5.9525 |
| 37 | -5.9404 | -72.1029  | -24.7118 | -8.3766 | -27.7368 | -5.9404 |
| 37 | -5.8757 | -73.7415  | -17.6358 | -8.5947 | -25.6477 | -5.8757 |
| 38 | -5.5352 | -145.3073 | -17.0633 | -8.6844 | -19.8623 | -5.5352 |
| 38 | -4.9667 | -140.8827 | -19.8235 | -8.6551 | -28.0095 | -4.9667 |
| 38 | -4.9584 | -143.9345 | -19.4633 | -9.6520 | -17.9319 | -4.9584 |
| 38 | -4.8859 | -141.0978 | -20.1711 | -8.7603 | -25.9320 | -4.8859 |
| 38 | -4.8726 | -141.7802 | -21.7738 | -8.5544 | -26.7487 | -4.8726 |
| 39 | -5.3322 | -118.9785 | -9.1725  | -9.3137 | -18.6062 | -5.3322 |
| 39 | -4.8993 | -117.8070 | -11.7296 | -8.5104 | -21.8773 | -4.8993 |
| 39 | -4.8931 | -119.4353 | -17.4423 | -8.3612 | -29.8660 | -4.8931 |
| 39 | -4.7796 | -118.8688 | -17.9774 | -8.7614 | -25.3359 | -4.7796 |
| 39 | -4.6111 | -119.4369 | -16.3157 | -8.7313 | -30.7797 | -4.6111 |
| 49 | -4.3046 | 17.5077   | -15.5436 | -7.7167 | -19.8817 | -4.3046 |
| 49 | -4.2884 | 17.4115   | -14.8656 | -8.1710 | -19.0041 | -4.2884 |

|        |         |          |          |         |          |         |
|--------|---------|----------|----------|---------|----------|---------|
| 49     | -4.2882 | 14.4340  | -19.1156 | -8.2046 | -21.4504 | -4.2882 |
| 49     | -4.1990 | 18.8178  | -18.3678 | -8.2389 | -18.3937 | -4.1990 |
| 49     | -4.1912 | 20.5396  | -15.3888 | -8.1015 | -19.5023 | -4.1912 |
| 50     | -5.6176 | 36.2641  | -15.1168 | -7.9854 | -20.0901 | -5.6176 |
| 50     | -5.6173 | 37.6235  | -19.1195 | -7.8075 | -21.5770 | -5.6173 |
| 50     | -5.4932 | 37.4128  | -20.6806 | -7.8797 | -21.2514 | -5.4932 |
| 50     | -5.2406 | 35.5924  | -15.8339 | -7.9518 | -20.3255 | -5.2406 |
| 50     | -5.2179 | 37.1503  | -16.7410 | -7.7157 | -22.4346 | -5.2179 |
| 51     | -6.0491 | 19.7803  | -19.0691 | -8.1402 | -23.1358 | -6.0491 |
| 51     | -6.0439 | 20.2981  | -22.7599 | -8.2127 | -23.2525 | -6.0439 |
| 51     | -6.0204 | 21.9774  | -20.6010 | -8.8690 | -21.8055 | -6.0204 |
| 51     | -5.8278 | 23.8223  | -24.2422 | -8.2092 | -23.0137 | -5.8278 |
| 51     | -5.7679 | 23.6413  | -15.0923 | -8.5685 | -21.6630 | -5.7679 |
| 52     | -6.3798 | 3.9218   | -14.0076 | -8.4794 | -21.3763 | -6.3798 |
| 52     | -6.3741 | -3.1675  | -20.8488 | -8.7941 | -22.1811 | -6.3741 |
| 52     | -6.1751 | -3.0134  | -22.5094 | -8.6615 | -21.4697 | -6.1751 |
| 52     | -6.1436 | 2.3686   | -18.8041 | -8.8918 | -23.5124 | -6.1436 |
| 52     | -6.0845 | 6.1998   | -23.4263 | -9.2607 | -20.8541 | -6.0845 |
| 53     | -6.6388 | -0.1960  | -14.7378 | -9.0941 | -15.9828 | -6.6388 |
| 53     | -6.5780 | -7.8056  | -20.5304 | -9.3202 | -23.6089 | -6.5780 |
| 53     | -6.5190 | -0.1792  | -23.3101 | -8.4270 | -16.3114 | -6.5190 |
| 53     | -6.5175 | -8.3566  | -21.5743 | -8.5800 | -24.3277 | -6.5175 |
| 53     | -6.5070 | -7.5486  | -18.3678 | -8.8382 | -24.5050 | -6.5070 |
| 54     | -7.1372 | -2.0929  | -22.1443 | -8.7294 | -23.8655 | -7.1372 |
| 54     | -6.7926 | 4.8865   | -15.2122 | -9.0549 | -21.4526 | -6.7926 |
| 54     | -6.5545 | 3.3080   | -23.7167 | -8.8303 | -25.0563 | -6.5545 |
| 54     | -6.4753 | -3.5967  | -21.5505 | -8.9400 | -22.3819 | -6.4753 |
| 54     | -6.4619 | -2.7573  | -17.3143 | -9.7629 | -21.0312 | -6.4619 |
| S18616 | -6.7109 | -85.1541 | -26.2111 | -8.7237 | -25.7039 | -6.7109 |
| S18616 | -6.5137 | -81.8289 | -22.3768 | -8.6693 | -24.3697 | -6.5137 |
| S18616 | -6.4083 | -84.2816 | -21.0786 | -8.6710 | -23.3563 | -6.4083 |

|               |         |          |          |         |          |         |
|---------------|---------|----------|----------|---------|----------|---------|
| <b>S18616</b> | -6.3762 | -81.4119 | -19.1685 | -9.1557 | -23.2755 | -6.3762 |
| <b>S18616</b> | -6.3178 | -76.6740 | -22.7904 | -9.8164 | -15.2940 | -6.3178 |

**Table S3.** Chemical structure of the dual acting *h*TAAR1 and  $\alpha_2$ ADR ligands. The corresponding binding affinity values are also reported.

| Compound  | TAAR1 Ki (nM) | $\alpha_2$ -ADR / <i>h</i> TAAR1 Ki | $\alpha_2$ -ADR Ki (nM) | Chemical Structure                                                                    |
|-----------|---------------|-------------------------------------|-------------------------|---------------------------------------------------------------------------------------|
| <b>5a</b> | 1640.00       | 0.06                                | 98.40                   | 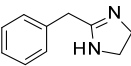   |
| <b>5b</b> | 500.00        | 0.05                                | 25.00                   |    |
| <b>5c</b> | 82.00         | 0.77                                | 63.14                   |    |
| <b>5d</b> | 300.00        | 0.68                                | 204.00                  |    |
| <b>5e</b> | 825.00        | 4.00                                | 3300.00                 |   |
| <b>6a</b> | 400.00        | 4.70                                | 1880.00                 |  |
| <b>6b</b> | 1390.00       | 0.70                                | 973.00                  |  |
| <b>6c</b> | 36.00         | 4.50                                | 162.00                  |  |

|           |        |        |         |                                                                                       |
|-----------|--------|--------|---------|---------------------------------------------------------------------------------------|
| <b>6d</b> | 24.00  | 100.00 | 2400.00 | 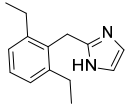   |
| <b>6e</b> | 630.00 | 14.00  | 8820.00 |    |
| <b>11</b> | 20.00  | 2.50   | 50.00   |    |
| <b>12</b> | 2.00   | 5.10   | 10.20   |    |
| <b>13</b> | 65.00  | 5.30   | 344.50  |    |
| <b>14</b> | 11.00  | 1.60   | 17.60   |    |
| <b>15</b> | 48.00  | 1.60   | 76.80   |    |
| <b>16</b> | 22.00  | 23.70  | 521.40  |    |
| <b>17</b> | 32.00  | 4.00   | 128.00  |   |
| <b>18</b> | 69.00  | 0.90   | 62.10   |  |
| <b>19</b> | 100.00 | 3.30   | 330.00  |  |
| <b>20</b> | 35.00  | 0.14   | 4.90    |  |



|    |       |        |         |                                                                                       |
|----|-------|--------|---------|---------------------------------------------------------------------------------------|
| 21 | 12.00 | 4.00   | 48.00   | 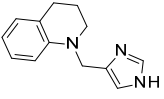   |
| 22 | 40.00 | 76.00  | 3040.00 |    |
| 23 | 4.00  | 72.00  | 288.00  |    |
| 24 | 6.00  | 140.00 | 840.00  |    |
| 25 | 4.00  | 71.00  | 284.00  |    |
| 26 | 4.00  | 37.00  | 148.00  |    |
| 27 | 18.00 | 16.00  | 288.00  |    |
| 28 | 12.00 | 34.00  | 408.00  |   |
| 29 | 13.00 | 104.00 | 1352.00 |  |
| 30 | 5.00  | 67.00  | 335.00  |  |

|    |         |        |         |                                                                                       |
|----|---------|--------|---------|---------------------------------------------------------------------------------------|
| 31 | 80.00   | 33.00  | 2640.00 | 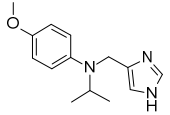   |
| 32 | 128.00  | 8.00   | 1024.00 |    |
| 33 | 11.00   | 1.30   | 14.30   |    |
| 34 | 2.00    | 21.00  | 42.00   |    |
| 35 | 33.00   | 200.00 | 6600.00 |    |
| 36 | 195.00  | 12.00  | 2340.00 |    |
| 37 | 12.00   | 62.00  | 744.00  |    |
| 38 | 100.00  | 33.00  | 3300.00 |   |
| 39 | 84.00   | 3.00   | 252.00  |  |
| 49 | 4250.00 | 0.20   | 850.00  |  |
| 50 | 1270.00 | 0.20   | 254.00  |  |

|           |        |       |         |                                                                                     |
|-----------|--------|-------|---------|-------------------------------------------------------------------------------------|
| <b>51</b> | 710.00 | 0.70  | 497.00  | 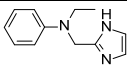 |
| <b>52</b> | 470.00 | 8.00  | 3760.00 |  |
| <b>53</b> | 68.00  | 64.00 | 4352.00 |  |
| <b>54</b> | 138.00 | 22.00 | 3036.00 |  |

**Table S4.** The predicted (Pred. pKi) and experimental (Exp. pKi) *h*TAAR1 binding affinity values of the compounds (Comp.) herein explored are reported, in tandem with the collected descriptors. The compounds included in the test set are underlined along the first column.

| Comp.     | Exp.<br>hTAAR1<br>pKi | GCUT_SM<br>R_0 | E       | dipoleY | dipoleZ | DCASA    | Q_RPC- | Q_VSA_FHYD | SlogP_VSA4 | vsurf_EDmin<br>1 | vsurf_IW5 | Pred.<br>hTAAR1<br>pKi | Residual |
|-----------|-----------------------|----------------|---------|---------|---------|----------|--------|------------|------------|------------------|-----------|------------------------|----------|
| <u>5a</u> | 5.79                  | -0.5048        | 31.5871 | -0.2109 | 0.1291  | 157.4579 | 0.1929 | 0.9660     | 3.1856     | -2.5019          | 2.5918    | 5.81                   | 0.02     |
| <b>5b</b> | 6.30                  | -0.5048        | 35.6559 | -0.2837 | 0.0583  | 105.3684 | 0.2856 | 0.9300     | 3.1856     | -2.8846          | 4.3883    | 6.43                   | 0.13     |
| <b>5c</b> | 7.09                  | -0.5049        | 36.8534 | -0.1856 | 0.1142  | 197.4412 | 0.1676 | 0.9717     | 9.5567     | -2.4239          | 3.2398    | 6.65                   | -0.44    |
| <b>5d</b> | 6.52                  | -0.5164        | 40.9543 | -0.1532 | 0.1450  | 309.1655 | 0.1460 | 0.8196     | 9.5567     | -2.2841          | 3.4189    | 6.58                   | 0.06     |
| <b>5e</b> | 6.08                  | -0.5222        | 51.2710 | -0.1713 | 0.1310  | 420.1130 | 0.1252 | 0.7085     | 9.5567     | -2.3425          | 3.5809    | 6.28                   | 0.20     |
| <b>6a</b> | 6.40                  | -0.4721        | 17.4561 | -0.3373 | 0.1267  | 39.2795  | 0.1286 | 0.9492     | 5.5135     | -2.3605          | 3.1705    | 6.70                   | 0.30     |
| <u>6b</u> | 5.86                  | -0.4719        | 22.6175 | -0.4081 | 0.0531  | 7.5834   | 0.1471 | 0.9579     | 5.5135     | -2.9112          | 4.4446    | 7.19                   | 1.33     |
| <b>6c</b> | 7.44                  | -0.4847        | 22.7412 | -0.2384 | 0.0291  | 77.0173  | 0.1077 | 0.9578     | 11.8846    | -2.3530          | 3.5965    | 7.60                   | 0.16     |
| <b>6d</b> | 7.62                  | -0.5164        | 27.2421 | -0.2481 | 0.1213  | 187.1044 | 0.1024 | 0.8067     | 11.8846    | -2.2929          | 3.8201    | 7.56                   | -0.06    |
| <u>6e</u> | 6.20                  | -0.5222        | 37.6495 | -0.2553 | 0.0813  | 279.6188 | 0.0881 | 0.6968     | 11.8846    | -2.3479          | 3.6272    | 7.19                   | 0.99     |
| <b>11</b> | 7.70                  | -0.4682        | 19.6551 | 0.2232  | 0.3121  | 39.5252  | 0.1436 | 0.9484     | 5.9423     | -2.7064          | 3.6205    | 8.35                   | 0.65     |
| <b>12</b> | 8.70                  | -0.5062        | 19.8977 | 0.2076  | 0.3165  | 107.3042 | 0.1291 | 0.9532     | 5.9423     | -2.8273          | 3.5625    | 8.22                   | -0.48    |
| <b>13</b> | 7.19                  | -0.4661        | 27.3867 | 0.2779  | 0.3305  | 118.9644 | 0.1727 | 0.9526     | 2.7567     | -2.4910          | 3.1167    | 7.28                   | 0.09     |
| <u>14</u> | 7.96                  | -0.4777        | 35.6927 | 0.2773  | 0.4286  | 129.5135 | 0.1664 | 0.9021     | 2.7567     | -2.4044          | 4.3910    | 7.55                   | -0.41    |

|           |      |         |         |         |        |          |        |        |        |         |        |      |       |
|-----------|------|---------|---------|---------|--------|----------|--------|--------|--------|---------|--------|------|-------|
| <b>15</b> | 7.32 | -0.5075 | 34.0067 | 0.2784  | 0.4457 | 172.0687 | 0.1479 | 0.8286 | 2.7567 | -2.4756 | 4.3415 | 7.70 | 0.38  |
| <b>16</b> | 7.66 | -0.5159 | 36.9333 | 0.2558  | 0.3741 | 227.1855 | 0.1336 | 0.7652 | 2.7567 | -2.4805 | 4.5911 | 7.58 | -0.08 |
| <b>17</b> | 7.49 | -0.4747 | 55.3304 | 0.2831  | 0.3820 | 172.2133 | 0.1204 | 0.9263 | 5.9423 | -2.4080 | 5.0069 | 7.55 | 0.06  |
| <b>18</b> | 7.16 | -0.4640 | 59.3388 | 0.3181  | 0.1707 | 121.0741 | 0.1098 | 0.9673 | 2.7567 | -2.5218 | 4.9119 | 7.04 | -0.12 |
| <b>19</b> | 7.00 | -0.4690 | 38.1040 | 0.2488  | 0.4033 | 211.4028 | 0.1293 | 0.8814 | 2.7567 | -2.6171 | 4.1916 | 7.34 | 0.34  |
| <b>20</b> | 7.46 | -0.5048 | 37.7179 | 0.2324  | 0.3856 | 175.0137 | 0.1665 | 0.9569 | 5.9423 | -2.4391 | 4.6835 | 7.73 | 0.27  |
| <b>21</b> | 7.92 | -0.5144 | 35.4751 | 0.2615  | 0.4461 | 224.3391 | 0.1507 | 0.9603 | 5.9423 | -2.6025 | 4.6638 | 7.88 | -0.04 |
| <b>22</b> | 7.40 | -0.5158 | 44.5035 | 0.1838  | 0.4414 | 57.1006  | 0.1647 | 0.8266 | 2.7567 | -2.8280 | 4.0049 | 7.70 | 0.30  |
| <b>23</b> | 8.40 | -0.5159 | 36.3419 | 0.1463  | 0.6620 | 32.7312  | 0.1450 | 0.8266 | 2.7567 | -2.9375 | 4.0920 | 8.19 | -0.21 |
| <b>24</b> | 8.22 | -0.5159 | 37.2205 | 0.2702  | 0.5672 | 23.7212  | 0.1452 | 0.8266 | 2.7567 | -2.8690 | 4.4702 | 8.44 | 0.22  |
| <b>25</b> | 8.40 | -0.5158 | 39.0151 | 0.2055  | 0.8128 | 145.5844 | 0.1511 | 0.8373 | 2.7567 | -3.1213 | 4.2703 | 8.21 | -0.19 |
| <b>26</b> | 8.40 | -0.5158 | 35.5056 | 0.2912  | 0.5749 | 144.4861 | 0.1490 | 0.8373 | 2.7567 | -3.0699 | 4.5032 | 8.32 | -0.08 |
| <b>27</b> | 7.74 | -0.5159 | 40.8565 | 0.0533  | 0.4840 | 160.3320 | 0.1457 | 0.8176 | 2.7567 | -2.5605 | 4.2162 | 7.19 | -0.55 |
| <b>28</b> | 7.92 | -0.5159 | 33.3279 | 0.1153  | 0.7269 | 159.9934 | 0.1355 | 0.6726 | 2.7567 | -2.7422 | 4.0707 | 8.04 | 0.12  |
| <b>29</b> | 7.89 | -0.5159 | 36.8043 | 0.2724  | 0.6086 | 155.0814 | 0.1441 | 0.8176 | 2.7567 | -2.6938 | 4.3367 | 7.97 | 0.08  |
| <b>30</b> | 8.30 | -0.5159 | 44.3150 | 0.3425  | 0.4258 | 281.6604 | 0.1247 | 0.6961 | 2.7567 | -2.8822 | 3.7816 | 7.63 | -0.67 |
| <b>31</b> | 7.10 | -0.5159 | 48.0157 | 0.3007  | 0.2334 | 281.4287 | 0.1342 | 0.8267 | 2.7567 | -2.8415 | 3.8066 | 7.04 | -0.06 |
| <b>32</b> | 6.89 | -0.5159 | 18.7812 | -0.2198 | 0.7839 | 359.2455 | 0.1709 | 0.6311 | 2.7567 | -2.6959 | 3.2562 | 6.97 | 0.08  |
| <b>33</b> | 7.96 | -0.4776 | 35.0484 | 0.1958  | 0.6975 | 28.5787  | 0.1689 | 0.9096 | 2.7567 | -2.8021 | 4.0481 | 8.06 | 0.10  |
| <b>34</b> | 8.70 | -0.5074 | 36.6627 | 0.1293  | 0.5517 | 22.5185  | 0.1566 | 0.8898 | 2.7567 | -2.5780 | 4.8064 | 7.93 | -0.77 |
| <b>35</b> | 7.48 | -0.5191 | 46.8478 | 0.0650  | 0.4660 | 23.7223  | 0.1375 | 0.7766 | 2.7567 | -2.7308 | 4.8160 | 7.81 | 0.33  |
| <b>36</b> | 6.71 | -0.5158 | 34.0791 | 0.2448  | 0.1901 | 212.0978 | 0.1190 | 0.6909 | 2.7567 | -2.6528 | 3.2740 | 7.39 | 0.68  |
| <b>37</b> | 7.92 | -0.5158 | 37.2112 | 0.3324  | 0.2404 | 268.9462 | 0.1117 | 0.7176 | 2.7567 | -2.6913 | 4.0007 | 7.58 | -0.34 |
| <b>38</b> | 7.00 | -0.5157 | 29.1544 | 0.2132  | 0.3551 | 462.3309 | 0.1342 | 0.7344 | 2.7567 | -2.9915 | 2.1633 | 6.69 | -0.31 |
| <b>39</b> | 7.08 | -0.5075 | 32.5707 | 0.4336  | 0.2463 | 331.3762 | 0.1314 | 0.7941 | 2.7567 | -2.7324 | 2.4740 | 7.13 | 0.05  |
| <b>49</b> | 5.37 | -0.4695 | 27.2743 | -0.2927 | 0.1517 | 93.9851  | 0.1716 | 0.9073 | 2.3279 | -2.4231 | 3.3491 | 6.10 | 0.73  |
| <b>50</b> | 5.90 | -0.4781 | 35.1841 | -0.3034 | 0.2338 | 104.3671 | 0.1657 | 0.9028 | 2.3279 | -2.3549 | 3.8473 | 6.04 | 0.14  |
| <b>51</b> | 6.15 | -0.5075 | 33.3358 | -0.3183 | 0.2821 | 145.9252 | 0.1519 | 0.7763 | 2.3279 | -2.3956 | 3.8095 | 6.26 | 0.11  |
| <b>52</b> | 6.33 | -0.5159 | 35.9727 | -0.3244 | 0.2784 | 177.5581 | 0.1383 | 0.7657 | 2.3279 | -2.3224 | 3.4208 | 5.96 | -0.37 |
| <b>53</b> | 7.17 | -0.5159 | 35.7515 | -0.0575 | 0.2377 | 14.3486  | 0.1402 | 0.7812 | 2.3279 | -2.2991 | 4.0105 | 7.06 | -0.11 |
| <b>54</b> | 6.86 | -0.5159 | 36.6405 | -0.2461 | 0.4066 | 8.5404   | 0.1409 | 0.8271 | 2.3279 | -2.4028 | 3.9164 | 6.77 | -0.09 |

**Table S5.** The predicted (Pred. pKi) and experimental (Exp. pKi)  $\alpha_2$ -ADR binding affinity values of the compounds (Comp.) herein explored are reported, in tandem with the collected descriptors. The compounds included in the test set are underlined along the first column.

| Comp.     | Exp. $\alpha_2$ -ADR pKi | GCUT_SMR_1 | balabanJ | E_tor   | Q_VSA_FH_YD | Q_VSA_PN_EG | Q_VSA_P_OL | vsurf_oth_er | SlogP_VS_A3 | vsurf_ID_1 | vsurf_ID7 | vsurf_IW_4 | Pred. $\alpha_2$ -ADR Ki | Residual |
|-----------|--------------------------|------------|----------|---------|-------------|-------------|------------|--------------|-------------|------------|-----------|------------|--------------------------|----------|
| <u>5a</u> | 7.01                     | -0.1920    | 1.7133   | 6.3513  | 0.9660      | 5.8195      | 5.8195     | 11.1906      | 36.8792     | 0.4434     | 0.6388    | 2.3317     | 7.05                     | 7.01     |
| <u>5b</u> | 7.60                     | -0.1522    | 1.8792   | 6.2372  | 0.9300      | 5.8195      | 14.4385    | 11.1906      | 36.8792     | 0.3928     | 0.9248    | 3.3062     | 7.97                     | 7.60     |
| <u>5c</u> | 7.20                     | -0.1506    | 1.8792   | 7.9738  | 0.9717      | 5.8195      | 5.8195     | 11.1906      | 36.8792     | 0.4681     | 0.7490    | 2.9026     | 7.07                     | 7.20     |
| <u>5d</u> | 6.69                     | -0.1502    | 1.9471   | 7.9827  | 0.8196      | 43.3148     | 43.3148    | 11.1906      | 36.8792     | 0.4608     | 0.8987    | 2.9886     | 6.41                     | 6.69     |
| <u>5e</u> | 5.48                     | -0.1487    | 2.0545   | 8.5903  | 0.7085      | 80.8102     | 80.8102    | 11.1906      | 36.8792     | 0.4280     | 0.9322    | 3.1916     | 5.58                     | 5.48     |
| <u>6a</u> | 5.73                     | -0.2094    | 1.7159   | 3.9091  | 0.9492      | 0.0000      | 8.6190     | 11.1906      | 0.0000      | 0.4257     | 0.4994    | 2.6134     | 6.50                     | 5.73     |
| <u>6b</u> | 6.01                     | -0.1759    | 1.8811   | 3.6180  | 0.9579      | 0.0000      | 8.6190     | 11.1906      | 0.0000      | 0.3239     | 0.6892    | 3.4183     | 6.69                     | 6.01     |
| <u>6c</u> | 6.79                     | -0.1726    | 1.8811   | 5.2639  | 0.9578      | 0.0000      | 8.6190     | 11.1906      | 0.0000      | 0.4211     | 0.3080    | 3.1153     | 6.18                     | 6.79     |
| <u>6d</u> | 5.62                     | -0.1717    | 1.9484   | 5.2933  | 0.8067      | 37.4954     | 46.1144    | 11.1906      | 0.0000      | 0.4083     | 0.5363    | 3.1678     | 5.60                     | 5.62     |
| <u>6e</u> | 5.05                     | -0.1691    | 2.0555   | 5.8089  | 0.6968      | 74.9907     | 83.6097    | 11.1906      | 0.0000      | 0.3610     | 0.4533    | 3.3044     | 4.63                     | 5.05     |
| <u>11</u> | 7.30                     | -0.2161    | 1.7164   | 3.3058  | 0.9484      | 0.1369      | 8.7559     | 24.7905      | 0.0000      | 0.5883     | 0.6782    | 3.4603     | 7.29                     | 7.30     |
| <u>12</u> | 7.99                     | -0.2161    | 1.6145   | 0.0625  | 0.9532      | 0.1369      | 8.7559     | 24.7905      | 0.0000      | 0.5427     | 0.8767    | 3.3721     | 7.70                     | 7.99     |
| <u>13</u> | 6.46                     | -0.2173    | 1.6145   | 3.6814  | 0.9526      | 0.2738      | 8.8928     | 24.7905      | 0.0000      | 0.6181     | 0.1463    | 2.5496     | 6.61                     | 6.46     |
| <u>14</u> | 7.75                     | -0.1975    | 1.7368   | 4.1318  | 0.9021      | 12.3918     | 21.0108    | 24.7905      | 0.0000      | 0.6273     | 0.4429    | 4.0897     | 6.96                     | 7.75     |
| <u>15</u> | 7.11                     | -0.1963    | 1.8018   | 4.0616  | 0.8286      | 31.1395     | 39.7585    | 24.7905      | 18.4396     | 0.5725     | 0.4914    | 4.1262     | 7.15                     | 7.11     |
| <u>16</u> | 6.28                     | -0.1938    | 1.8802   | 4.9837  | 0.7652      | 49.8872     | 58.5062    | 24.7905      | 0.0000      | 0.6438     | 0.5367    | 4.3255     | 6.16                     | 6.28     |
| <u>17</u> | 6.89                     | -0.2161    | 1.5574   | 5.3588  | 0.9263      | 12.3918     | 21.0108    | 24.7905      | 0.0000      | 0.5629     | 0.4175    | 4.8839     | 7.36                     | 6.89     |
| <u>18</u> | 7.21                     | -0.2161    | 1.6255   | 8.8673  | 0.9673      | 0.1369      | 8.7559     | 24.7905      | 0.0000      | 0.5888     | 0.4177    | 4.6235     | 7.33                     | 7.21     |
| <u>19</u> | 6.48                     | -0.2161    | 1.5695   | 12.1702 | 0.8814      | 17.5395     | 26.1585    | 24.7905      | 0.0000      | 0.5249     | 0.5755    | 4.0537     | 6.96                     | 6.48     |
| <u>20</u> | 8.31                     | -0.1857    | 1.5747   | 7.4637  | 0.9569      | 0.1369      | 8.7559     | 24.7905      | 18.4396     | 0.5831     | 0.3270    | 4.4199     | 7.92                     | 8.31     |
| <u>21</u> | 7.32                     | -0.1858    | 1.5975   | 4.4908  | 0.9603      | 0.1369      | 8.7559     | 24.7905      | 18.4396     | 0.5441     | 0.4096    | 4.4360     | 8.05                     | 7.32     |
| <u>22</u> | 5.52                     | -0.1802    | 1.9531   | 15.3712 | 0.8266      | 37.6322     | 46.2513    | 24.7905      | 0.0000      | 0.4334     | 0.5836    | 3.9053     | 5.85                     | 5.52     |
| <u>23</u> | 6.54                     | -0.1748    | 1.9124   | 7.3751  | 0.8266      | 37.6322     | 46.2513    | 24.7905      | 0.0000      | 0.4706     | 0.6459    | 3.8533     | 6.21                     | 6.54     |
| <u>24</u> | 6.08                     | -0.1797    | 1.8776   | 7.4955  | 0.8266      | 37.6322     | 46.2513    | 24.7905      | 0.0000      | 0.4711     | 0.6446    | 4.2023     | 6.36                     | 6.08     |
| <u>25</u> | 6.55                     | -0.1647    | 1.9273   | 7.4668  | 0.8373      | 37.6322     | 46.2513    | 24.7905      | 0.0000      | 0.4115     | 0.6399    | 4.0779     | 6.23                     | 6.55     |
| <u>26</u> | 6.83                     | -0.1460    | 1.9562   | 7.3479  | 0.8373      | 37.6322     | 46.2513    | 24.7905      | 0.0000      | 0.4088     | 0.5248    | 4.2847     | 6.14                     | 6.83     |

|           |      |         |        |         |        |         |          |         |         |        |        |        |      |      |
|-----------|------|---------|--------|---------|--------|---------|----------|---------|---------|--------|--------|--------|------|------|
| <b>27</b> | 6.54 | -0.1937 | 1.9531 | 9.6877  | 0.8176 | 37.6322 | 46.2513  | 24.7905 | 0.0000  | 0.8199 | 1.2406 | 3.5093 | 6.70 | 6.54 |
| <b>28</b> | 6.39 | -0.1935 | 1.9124 | 9.2588  | 0.6726 | 74.3970 | 83.0160  | 24.7905 | 0.0000  | 0.9619 | 1.2894 | 3.4352 | 6.13 | 6.39 |
| <b>29</b> | 5.87 | -0.1933 | 1.8776 | 8.9709  | 0.8176 | 37.6322 | 46.2513  | 24.7905 | 0.0000  | 0.7650 | 0.9268 | 2.9975 | 6.34 | 5.87 |
| <b>30</b> | 6.47 | -0.1906 | 1.9154 | 9.2557  | 0.6961 | 66.9007 | 85.5197  | 24.7905 | 0.0000  | 0.5243 | 0.9115 | 3.0937 | 6.31 | 6.47 |
| <b>31</b> | 5.58 | -0.1968 | 1.8571 | 7.2616  | 0.8267 | 40.1360 | 48.7550  | 24.7905 | 0.0000  | 0.2485 | 0.3474 | 2.5761 | 5.48 | 5.58 |
| <b>32</b> | 5.99 | -0.1746 | 1.9757 | 46.6133 | 0.6311 | 94.5571 | 113.9543 | 31.3033 | 0.0000  | 0.7325 | 1.7489 | 3.0978 | 5.74 | 5.99 |
| <b>33</b> | 7.84 | -0.1784 | 1.7688 | 4.1851  | 0.9096 | 12.3918 | 21.0108  | 24.7905 | 0.0000  | 0.4918 | 0.6669 | 3.8289 | 7.03 | 7.84 |
| <b>34</b> | 7.38 | -0.1771 | 1.8347 | 5.5075  | 0.8898 | 18.8846 | 27.5036  | 24.7905 | 18.4396 | 0.5462 | 0.7210 | 4.6236 | 7.69 | 7.38 |
| <b>35</b> | 5.18 | -0.1711 | 2.0002 | 11.2749 | 0.7766 | 56.3799 | 64.9989  | 24.7905 | 0.0000  | 0.4884 | 0.5347 | 4.5949 | 5.71 | 5.18 |
| <b>36</b> | 5.63 | -0.1816 | 1.8802 | 5.3249  | 0.6909 | 67.8246 | 76.4436  | 35.9811 | 0.0000  | 0.7747 | 1.0942 | 3.1464 | 6.32 | 5.63 |
| <b>37</b> | 6.13 | -0.1837 | 1.9154 | 6.6928  | 0.7176 | 70.3284 | 78.9474  | 51.4344 | 0.0000  | 0.4344 | 1.0296 | 2.4707 | 6.13 | 6.13 |
| <b>38</b> | 5.48 | -0.1614 | 1.9124 | 4.3663  | 0.7344 | 61.2523 | 69.8713  | 49.4828 | 0.0000  | 0.5495 | 1.0985 | 1.9388 | 6.30 | 5.48 |
| <b>39</b> | 6.60 | -0.1831 | 1.8388 | 6.0013  | 0.7941 | 45.0084 | 53.6274  | 55.9254 | 18.4396 | 0.1450 | 0.6994 | 1.1946 | 6.65 | 6.60 |
| <b>49</b> | 6.07 | -0.2115 | 1.6141 | 35.4957 | 0.9073 | 0.6369  | 17.3749  | 11.1906 | 0.0000  | 0.6643 | 0.6669 | 2.6865 | 6.54 | 6.07 |
| <b>50</b> | 6.60 | -0.1953 | 1.7365 | 5.9932  | 0.9028 | 12.2549 | 20.8739  | 11.1906 | 0.0000  | 0.4957 | 0.4490 | 3.3765 | 6.37 | 6.60 |
| <b>51</b> | 6.30 | -0.1941 | 1.8015 | 5.9776  | 0.7763 | 43.2575 | 51.8765  | 11.1906 | 18.4396 | 0.4714 | 0.3470 | 3.4573 | 6.19 | 6.30 |
| <b>52</b> | 5.42 | -0.1915 | 1.8800 | 6.6689  | 0.7657 | 49.7503 | 58.3693  | 11.1906 | 0.0000  | 0.4878 | 0.3623 | 3.2201 | 5.27 | 5.42 |
| <b>53</b> | 5.36 | -0.1771 | 1.9122 | 6.5426  | 0.7812 | 49.7503 | 58.3693  | 11.1906 | 0.0000  | 0.4104 | 0.6361 | 3.7671 | 5.65 | 5.36 |
| <b>54</b> | 5.52 | -0.1798 | 1.8774 | 6.5769  | 0.8271 | 37.4954 | 46.1144  | 11.1906 | 0.0000  | 0.4166 | 0.6571 | 3.6761 | 5.94 | 5.52 |

**Abbreviation** *BLOSUM62*: BLOcks SUBstitution Matrices; *RMSD*: Root-mean-square deviation

#### **Denotation of the scoring functions for MOE molecular docking calculations**

*S*: the final score, which is the score of the last stage of refinement; *E\_conf*: the energy of the conformer - if there is a refinement stage, this is the energy calculated at the end of the refinement; *E\_place*: score from the placement stage; *E\_score1/2*: score from rescoring stages 1 and 2; *E\_refine*: score from the refinement stage, calculated to be the sum of the van der Waals electrostatics and solvation energies, under the Generalized Born solvation model (GB/VI)

### Denotation of QSAR molecular descriptors

*GCUT\_SMR\_0*: the GCUT descriptors using atomic contribution to molar refractivity; *E*: value of the potential energy; *dipoleY*: the y component of the dipole moment (external coordinates); *dipoleZ*: the z component of the dipole moment; *DCASA*: absolute value of the difference between *CASA+* (Positive charge weighted surface area,  $ASA^+$  times  $\max \{ q_i > 0 \}$ ) and *CASA-* (Negative charge weighted surface area,  $ASA^-$  times  $\max \{ q_i < 0 \}$ ); *Q\_RPC-*: relative negative partial charge; *Q\_VSA\_FHYD*: fractional hydrophobic van der Waals surface area; *SlogP\_VSA4*: sum of  $v_i$  such that  $Li$  is in (0.1,0.15]; *vsurf\_EDmin1*: lowest hydrophobic energy; *vsurf\_IW5*: hydrophilic integy moment; *Q\_VSA\_PNEG*: fractional negative van der Waals surface area; *Q\_VSA\_POL*: total positive van der Waals surface area; *SlogP\_VSA3*: sum of  $v_i$  such that  $Li$  is in (0,0.1]; *vsurf\_ID7*: hydrophobic integy moment; *vsq\_other*: approximation to the sum of VDW surface areas ( $\text{\AA}^2$ ) of atoms typed as "other"; *E\_tor*: torsion (proper and improper) potential energy; *balabanJ*: Balaban's connectivity topological index; *vsurf\_ID1*: hydrophobic integy moment; *GCUT\_SMR\_1*: the GCUT descriptors using atomic contribution to molar refractivity.
